# Supplementary material
Source: PubMed Central journal article supplement (PMC4367268)
Supplement: supp_M114.595579_jbc.M114.595579-2.pdf [file supp_M114.595579_jbc.M114.595579-2.pdf]

| Patient                  | (A)                | (B)                     | (C)               | (D)                     |     |
|--------------------------|--------------------|-------------------------|-------------------|-------------------------|-----|
| Sex                      | Male               | Male                    | Male              | Male                    |     |
| Age (years)              | 42                 | 77                      | 84                | 84                      |     |
| BMI (kg/m <sup>2</sup> ) | 19.2               | 19.8                    | 18.5              | 24.1                    |     |
| Duration of DM (years)   |                    |                         | 10                | 40                      |     |
| Treatment for DM         |                    |                         | Sulfonylurea      | Insulin                 |     |
| HbA1c (%)                | 4.6                | 5.4                     | 7.5               | 7.3                     |     |
| Cause of surgery         | pancreatic cancer  | distal bile duct cancer | pancreatic cancer | distal bile duct cancer |     |
| Resected pancreas        | head               | head                    | head              | head                    |     |
| Glucagon tolerance test  | PG (0 min, mg/dl)  | 88                      | 110               | 130                     | 115 |
|                          | PG (6 min, mg/dl)  | 106                     | 127               | 142                     | 130 |
|                          | CPR (0 min, ng/ml) | 1.2                     | 2.1               | 0.8                     | 0.6 |
|                          | CPR (6 min, ng/ml) | 5.4                     | 5.8               | 1.9                     | 1.2 |
| △CPR (0-6 min)           | 4.2                | 3.7                     | 1.1               | 0.6                     |     |

**Supplemental Table 1.** The clinical background of donors
