# Supplementary material
Source: PubMed Central journal article supplement (PMC4367268)
Supplement: supp_M114.595579_jbc.M114.595579-3.pdf [file supp_M114.595579_jbc.M114.595579-3.pdf]

| ProbeName | Fold change([4-double-TGdb_db] vs [3-PDX-Credb_db]) | Regulation([4-double-TGdb_db] vs [3-PDX-Credb_db]) | [1-controldb_m](raw) | [2-db_db](raw) | [3-PDX-Credb_db](raw) | [4-double-TGdb_db](raw) | [1-controldb_m](normalized) | [2-db_db](normalized) |
|-----------|-----------------------------------------------------|----------------------------------------------------|----------------------|----------------|-----------------------|-------------------------|-----------------------------|-----------------------|
| A_55_P201 | 2.63                                                | up                                                 | 191.79               | 212.36         | 69.02                 | 183.51                  | 0.00                        | 0.25                  |
| A_55_P200 | 124.07                                              | up                                                 | 21.69                | 74.64          | 34.88                 | 4367.46                 | -1.32                       | 0.56                  |
| A_55_P207 | 25.07                                               | up                                                 |                      | 32.15          | 33.99                 | 860.24                  |                             | -0.03                 |
| A_52_P682 | 9.41                                                | up                                                 | 243.28               | 204.26         | 97.43                 | 925.81                  | 0.08                        | -0.08                 |
| A_55_P217 | 4.78                                                | up                                                 |                      | 20.97          | 25.38                 | 122.39                  |                             | -0.13                 |
| A_55_P209 | 2.26                                                | up                                                 | 18.36                | 21.51          | 22.23                 | 50.59                   | -0.34                       | -0.01                 |
| A_55_P217 | 6.15                                                | up                                                 | 3352.65              | 3204.55        | 3804.23               | 23620.30                | -0.15                       | -0.11                 |
| A_51_P110 | 2.03                                                | up                                                 | 8128.13              | 18337.97       | 13664.35              | 27973.23                | -1.05                       | 0.22                  |
| A_52_P488 | 3.09                                                | up                                                 | 17.81                | 28.86          | 29.02                 | 90.50                   | -0.79                       | 0.01                  |
| A_55_P210 | 5.33                                                | up                                                 | 209.27               | 391.13         | 288.04                | 1550.46                 | -0.77                       | 0.23                  |
| A_55_P218 | 2.55                                                | up                                                 | 13.24                | 20.45          | 13.42                 | 34.61                   | -0.41                       | 0.31                  |
| A_51_P428 | 74.23                                               | up                                                 |                      | 17.43          | 24.63                 | 1845.63                 |                             | -0.24                 |
| A_55_P195 | 2.82                                                | up                                                 | 15107.08             | 22232.48       | 22802.01              | 64849.64                | -0.67                       | -0.01                 |
| A_55_P199 | 25.80                                               | up                                                 | 39.22                | 72.16          | 45.15                 | 1175.62                 | -0.63                       | 0.35                  |
| A_55_P199 | 2.03                                                | up                                                 | 48.62                | 56.98          | 83.94                 | 171.98                  | -0.60                       | -0.27                 |
| A_55_P214 | 2.96                                                | up                                                 | 67.37                | 104.92         | 43.67                 | 130.69                  | -0.37                       | 0.37                  |
| A_51_P302 | 2.00                                                | up                                                 | 8443.73              | 1078.07        | 1174.87               | 2374.57                 | 2.27                        | -0.60                 |
| A_55_P217 | 4.62                                                | up                                                 | 96.99                | 169.89         | 138.99                | 647.58                  | -0.75                       | 0.15                  |
| A_51_P225 | 2.48                                                | up                                                 | 24.32                | 19.86          | 16.38                 | 41.06                   | 0.10                        | -0.10                 |
| A_55_P196 | 4.50                                                | up                                                 |                      | 14.16          | 20.17                 | 91.60                   |                             | -0.24                 |
| A_52_P627 | 3.29                                                | up                                                 | 30.12                | 14.23          | 18.47                 | 61.28                   | 0.31                        | -0.67                 |
| A_51_P408 | 18.08                                               | up                                                 | 18.31                |                | 10.90                 | 198.95                  | 0.33                        |                       |
| A_51_P113 | 2.13                                                | up                                                 |                      | 20.71          | 13.96                 | 30.05                   |                             | 0.29                  |
| A_52_P537 | 5.31                                                | up                                                 |                      | 48.67          | 35.90                 | 192.56                  |                             | 0.23                  |
| A_55_P195 | 3.66                                                | up                                                 |                      | 11.71          | 16.07                 | 59.29                   |                             | -0.22                 |
| A_51_P116 | 2.05                                                | up                                                 | 23.59                | 61.66          | 30.31                 | 62.61                   | -0.96                       | 0.53                  |
| A_55_P205 | 2.74                                                | up                                                 | 12.92                | 42.02          | 12.60                 | 34.87                   | -0.77                       | 1.03                  |
| A_51_P110 | 2.04                                                | up                                                 | 11.69                | 21.41          | 14.54                 | 29.88                   | -0.68                       | 0.29                  |
| A_55_P207 | 3.06                                                | up                                                 |                      | 38.63          | 13.11                 | 40.43                   |                             | 0.79                  |
| A_55_P214 | 2.09                                                | up                                                 | 28.46                | 37.08          | 34.44                 | 72.78                   | -0.42                       | 0.06                  |
| A_55_P197 | 2.08                                                | up                                                 | 29.30                | 17.94          | 20.46                 | 43.06                   | 0.22                        | -0.39                 |
| A_55_P206 | 2.28                                                | up                                                 | 289.43               | 262.73         | 97.04                 | 223.48                  | 0.17                        | 0.13                  |
| A_55_P232 | 4.72                                                | up                                                 | 4664.11              | 97.88          | 90.56                 | 431.40                  | 4.42                        | -1.05                 |
| A_55_P204 | 2.44                                                | up                                                 | 369.36               | 120.02         | 115.60                | 285.01                  | 0.92                        | -0.61                 |
| A_51_P369 | 5.35                                                | up                                                 | 17.15                | 46.87          | 39.73                 | 214.72                  | -1.42                       | 0.13                  |
| A_51_P477 | 2.10                                                | up                                                 | 93.83                | 101.25         | 54.30                 | 115.02                  | -0.10                       | 0.10                  |
| A_55_P208 | 2.45                                                | up                                                 | 665.00               | 72.28          | 97.17                 | 240.42                  | 2.05                        | -1.05                 |
| A_51_P456 | 11.38                                               | up                                                 | 26.36                | 72.95          | 70.59                 | 811.02                  | -1.53                       | 0.03                  |
| A_51_P238 | 2.66                                                | up                                                 | 195.82               | 133.88         | 180.66                | 485.33                  | 0.02                        | -0.43                 |
| A_66_P110 | 6.18                                                | up                                                 | 115.13               | 94.72          | 86.11                 | 536.96                  | 0.09                        | -0.09                 |
| A_51_P205 | 5.54                                                | up                                                 | 183.65               | 157.19         | 125.24                | 700.80                  | 0.06                        | -0.06                 |
| A_52_P602 | 8.95                                                | up                                                 | 616.55               | 4714.29        | 2827.23               | 25546.16                | -2.66                       | 0.38                  |
| A_55_P209 | 2.51                                                | up                                                 | 194.92               | 241.21         | 78.16                 | 197.65                  | -0.04                       | 0.36                  |
| A_51_P142 | 2.07                                                | up                                                 | 31.57                | 41.45          | 27.52                 | 57.48                   | -0.25                       | 0.25                  |
| A_55_P207 | 2.15                                                | up                                                 | 19.65                | 37.80          | 68.60                 | 148.89                  | -1.46                       | -0.42                 |
| A_52_P533 | 2.09                                                | up                                                 | 77.40                | 23.89          | 31.90                 | 67.44                   | 0.67                        | -0.93                 |
| A_55_P201 | 18.10                                               | up                                                 | 162.60               | 391.56         | 199.94                | 3652.12                 | -0.87                       | 0.49                  |
| A_55_P197 | 2.02                                                | up                                                 | 1160.61              | 30.76          | 12.35                 | 25.13                   | 5.30                        | 0.16                  |
| A_55_P216 | 4.52                                                | up                                                 | 20.67                | 21.24          | 16.90                 | 77.13                   | -0.07                       | 0.07                  |
| A_55_P196 | 11.12                                               | up                                                 | 41.63                | 39.27          | 36.78                 | 412.90                  | -0.01                       | 0.01                  |
| A_66_P138 | 7.67                                                | up                                                 | 18.31                | 63.08          | 57.68                 | 446.61                  | -1.81                       | 0.07                  |

|           |        |    |         |         |         |          |       |       |
|-----------|--------|----|---------|---------|---------|----------|-------|-------|
| A 55_P216 | 2.18   | up | 37.75   | 70.19   | 102.56  | 226.14   | -1.26 | -0.26 |
| A 55_P201 | 22.81  | up | 50.77   | 101.60  | 70.03   | 1612.28  | -0.82 | 0.28  |
| A 55_P203 | 2.12   | up | 1580.38 | 27.82   | 27.16   | 58.06    | 5.21  | -0.51 |
| A 55_P221 | 2.10   | up | 27.30   | 61.49   | 11.27   | 23.89    | 0.06  | 1.33  |
| A 52_P544 | 2.10   | up |         | 33.47   | 48.53   | 102.65   |       | -0.26 |
| A 55_P198 | 2.46   | up | 24.17   | 60.41   | 18.46   | 45.91    | -0.50 | 0.93  |
| A 66_P139 | 2.42   | up | 61.71   | 56.76   | 17.52   | 42.72    | 0.24  | 0.22  |
| A 51_P160 | 51.51  | up | 40.42   | 114.56  | 141.91  | 7378.96  | -1.75 | -0.14 |
| A 51_P390 | 2.05   | up |         | 73.30   | 26.96   | 55.86    |       | 0.94  |
| A 52_P409 | 84.57  | up | 27.07   | 31.14   | 30.60   | 2612.52  | -0.28 | 0.02  |
| A 55_P208 | 2.75   | up | 40.34   | 114.31  | 56.39   | 156.72   | -1.08 | 0.52  |
| A 51_P419 | 2.62   | up | 339.70  | 299.42  | 287.05  | 759.79   | 0.04  | -0.04 |
| A 55_P196 | 2.42   | up | 52.90   | 48.31   | 40.75   | 99.61    | 0.02  | -0.02 |
| A 55_P204 | 7.05   | up | 34.49   | 38.82   | 34.43   | 245.09   | -0.17 | 0.10  |
| A 55_P195 | 59.19  | up | 20.70   | 22.88   | 18.19   | 1086.65  | -0.12 | 0.12  |
| A 55_P200 | 5.21   | up | 134.64  | 141.35  | 152.97  | 804.95   | -0.22 | -0.05 |
| A 51_P460 | 2.01   | up | 127.59  | 907.26  | 174.56  | 353.66   | -1.03 | 1.90  |
| A 55_P195 | 2.56   | up | 104.11  | 41.85   | 14.65   | 37.78    | 1.31  | 0.09  |
| A 51_P134 | 3.56   | up | 67.36   | 126.40  | 133.01  | 478.07   | -1.03 | -0.03 |
| A 51_P133 | 10.17  | up |         | 29.40   | 25.78   | 264.77   |       | 0.10  |
| A 55_P198 | 5.66   | up | 119.34  | 343.41  | 269.21  | 1537.00  | -1.44 | 0.19  |
| A 55_P202 | 2.84   | up | 823.77  | 1274.80 | 976.80  | 2796.44  | -0.53 | 0.20  |
| A 51_P189 | 68.57  | up | 15.75   | 13.23   | 11.54   | 798.54   | 0.08  | -0.08 |
| A 55_P211 | 159.95 | up | 32.27   |         | 45.47   | 7340.92  | -0.29 |       |
| A 51_P257 | 2.71   | up | 372.43  | 106.92  | 40.81   | 111.61   | 1.69  | -0.01 |
| A 52_P481 | 3.67   | up | 46.56   | 76.41   | 89.87   | 332.54   | -0.92 | -0.11 |
| A 55_P207 | 4.59   | up | 85.49   | 27.96   | 27.47   | 127.13   | 0.76  | -0.76 |
| A 55_P207 | 2.58   | up | 3949.28 | 700.63  | 925.99  | 2412.05  | 1.33  | -1.07 |
| A 51_P219 | 3.54   | up | 39.89   | 62.45   | 84.28   | 300.91   | -0.95 | -0.21 |
| A 51_P460 | 35.04  | up | 18.45   | 13.41   | 17.84   | 630.84   | -0.02 | -0.38 |
| A 55_P218 | 2.00   | up | 104.21  | 87.05   | 86.94   | 175.59   | 0.08  | -0.08 |
| A 55_P199 | 5.80   | up | 32.21   | 87.11   | 31.98   | 187.31   | -0.80 | 0.73  |
| A 51_P155 | 76.26  | up | 21.70   | 24.65   | 11.77   | 905.80   | -0.14 | 0.14  |
| A 51_P327 | 7.00   | up | 56.67   | 160.16  | 35.74   | 252.58   | -0.80 | 0.80  |
| A 55_P197 | 23.65  | up | 230.80  | 924.80  | 1140.91 | 27232.19 | -2.24 | -0.14 |
| A 51_P259 | 2.72   | up | 26.60   | 38.14   | 20.02   | 54.93    | -0.31 | 0.31  |
| A 51_P308 | 2.31   | up | 45.58   | 40.69   | 30.84   | 71.80    | 0.03  | -0.03 |
| A 51_P139 | 2.21   | up | 116.26  | 493.28  | 367.66  | 820.11   | -1.96 | 0.22  |
| A 55_P212 | 2.04   | up | 179.17  | 386.51  | 290.68  | 598.39   | -0.99 | 0.22  |
| A 55_P199 | 8.51   | up | 15.95   | 90.18   | 74.40   | 639.05   | -2.45 | 0.15  |
| A 55_P204 | 145.76 | up | 40.18   | 1314.73 | 70.16   | 10322.58 | -3.01 | 2.12  |
| A 52_P502 | 2.56   | up | 147.81  | 403.56  | 37.88   | 98.07    | 0.26  | 1.81  |
| A 51_P164 | 2.72   | up | 77.81   | 120.00  | 85.80   | 235.55   | -0.47 | 0.25  |
| A 55_P220 | 3.00   | up | 66.52   | 54.73   | 66.68   | 201.94   | -0.04 | -0.22 |
| A 51_P489 | 2.29   | up | 138.16  | 119.09  | 142.86  | 330.29   | -0.06 | -0.18 |
| A 55_P213 | 4.03   | up | 174.15  | 282.77  | 117.21  | 477.36   | -0.40 | 0.40  |
| A 55_P216 | 45.89  | up | 399.89  | 1035.56 | 587.00  | 27189.90 | -1.05 | 0.42  |
| A 55_P205 | 2.17   | up | 215.05  | 36.49   | 40.97   | 89.85    | 1.75  | -0.71 |
| A 52_P662 | 2.88   | up | 107.98  | 73.60   | 88.68   | 257.90   | 0.10  | -0.35 |
| A 55_P196 | 2.40   | up | 5031.99 | 515.16  | 721.11  | 1749.20  | 2.09  | -1.10 |
| A 55_P201 | 2.08   | up |         | 15.89   | 11.74   | 24.69    |       | 0.23  |
| A 55_P201 | 40.01  | up | 40.00   | 88.74   | 59.19   | 2390.41  | -0.95 | 0.30  |
| A 55_P210 | 2.05   | up | 80.03   | 391.43  | 200.88  | 415.20   | -1.90 | 0.49  |
| A 52_P229 | 5.13   | up | 13.39   | 13.72   | 14.72   | 76.24    | -0.18 | -0.04 |
| A 55_P195 | 17.60  | up | 26.12   | 20.18   | 30.26   | 537.59   | -0.15 | -0.42 |
| A 55_P205 | 2.06   | up | 4821.97 | 775.59  | 975.79  | 2028.25  | 1.70  | -0.83 |
| A 55_P196 | 35.61  | up |         |         | 17.44   | 626.85   |       |       |
| A 55_P216 | 2.49   | up | 31.15   | 19.68   | 17.95   | 45.16    | 0.28  | -0.28 |
| A 55_P210 | 51.17  | up | 40.55   |         | 14.22   | 734.64   | 0.72  |       |

|           |       |    |         |          |          |          |       |       |
|-----------|-------|----|---------|----------|----------|----------|-------|-------|
| A 52_P270 | 8.01  | up |         | 20.36    | 15.58    | 125.99   |       | 0.20  |
| A 51_P140 | 2.06  | up | 39.09   | 61.16    | 64.84    | 134.98   | -0.78 | -0.03 |
| A 55_P206 | 2.40  | up | 14.68   | 33.25    | 23.92    | 57.94    | -1.03 | 0.25  |
| A 51_P170 | 7.21  | up | 37.19   | 67.95    | 63.22    | 459.81   | -0.91 | 0.06  |
| A 55_P217 | 2.45  | up | 273.65  | 1496.26  | 1022.74  | 2524.66  | -2.27 | 0.28  |
| A 51_P265 | 2.38  | up | 11.43   | 17.82    | 14.94    | 35.97    | -0.60 | 0.14  |
| A 55_P211 | 5.60  | up | 16.79   | 61.95    | 36.99    | 209.00   | -1.60 | 0.38  |
| A 65_P164 | 2.10  | up | 12.74   |          | 10.54    | 22.35    | 0.10  |       |
| A 55_P210 | 2.43  | up | 49.76   | 56.36    | 22.59    | 55.37    | -0.11 | 0.17  |
| A 55_P203 | 2.59  | up | 129.11  | 21.62    | 20.03    | 52.31    | 1.86  | -0.62 |
| A 51_P267 | 2.02  | up | 91.86   | 32.24    | 52.05    | 106.37   | 0.37  | -1.04 |
| A 51_P395 | 2.01  | up | 93.35   | 116.52   | 28.49    | 57.76    | 0.31  | 0.73  |
| A 66_P106 | 3.62  | up | 166.38  | 177.52   | 77.69    | 283.69   | -0.10 | 0.10  |
| A 51_P206 | 14.72 | up |         |          | 11.86    | 176.23   |       |       |
| A 51_P323 | 2.14  | up | 12.08   | 87.98    | 22.84    | 49.28    | -1.55 | 1.42  |
| A 51_P386 | 3.20  | up | 14.96   | 25.61    | 24.58    | 79.34    | -0.84 | 0.04  |
| A 51_P372 | 3.25  | up | 34.39   | 41.54    | 41.51    | 136.29   | -0.36 | 0.01  |
| A 51_P455 | 2.28  | up | 32.27   | 137.70   | 66.74    | 153.71   | -1.66 | 0.53  |
| A 55_P199 | 4.71  | up |         |          | 12.09    | 57.49    |       |       |
| A 51_P159 | 2.34  | up | 15.27   | 80.26    | 47.26    | 111.52   | -2.10 | 0.39  |
| A 52_P267 | 2.21  | up | 30.77   | 85.79    | 50.90    | 113.34   | -1.19 | 0.39  |
| A 52_P294 | 3.39  | up |         |          | 11.33    | 38.74    |       |       |
| A 51_P301 | 2.80  | up | 174.28  | 19.29    | 22.05    | 62.23    | 2.16  | -0.91 |
| A 55_P203 | 4.88  | up | 11.65   | 18.95    | 24.03    | 118.47   | -0.96 | -0.16 |
| A 51_P394 | 2.81  | up | 16.36   | 32.18    | 27.28    | 77.45    | -0.95 | 0.13  |
| A 55_P207 | 4.23  | up | 17.64   | 11.35    | 14.77    | 63.11    | 0.09  | -0.45 |
| A 55_P202 | 3.57  | up | 7758.31 | 15798.83 | 15927.41 | 57428.71 | -1.12 | 0.00  |
| A 55_P205 | 2.34  | up | 210.65  | 246.36   | 196.09   | 462.30   | -0.16 | 0.16  |
| A 55_P222 | 2.50  | up | 275.65  | 27.16    | 38.33    | 96.65    | 2.11  | -1.14 |
| A 55_P199 | 60.73 | up | 37.15   | 25.97    | 27.62    | 1693.22  | 0.17  | -0.24 |
| A 55_P202 | 3.62  | up | 116.79  | 264.68   | 24.44    | 89.34    | 0.16  | 1.44  |
| A 55_P203 | 2.14  | up | 39.46   | 70.31    | 101.33   | 218.75   | -1.19 | -0.25 |
| A 52_P318 | 3.71  | up | 259.80  | 285.94   | 232.69   | 871.50   | -0.12 | 0.12  |
| A 55_P196 | 10.61 | up | 237.90  | 708.65   | 953.64   | 10215.01 | -1.88 | -0.20 |
| A 52_P198 | 2.55  | up | 293.03  | 29.61    | 28.99    | 74.56    | 2.56  | -0.65 |
| A 51_P452 | 2.48  | up | 268.18  | 535.99   | 379.45   | 949.47   | -0.84 | 0.26  |
| A 52_P333 | 3.41  | up | 16.81   | 21.29    | 17.42    | 60.01    | -0.29 | 0.15  |
| A 51_P334 | 12.87 | up | 173.70  | 184.82   | 140.64   | 1826.28  | -0.09 | 0.09  |
| A 55_P198 | 2.95  | up | 324.55  | 22.30    | 34.23    | 101.92   | 2.39  | -1.38 |
| A 52_P525 | 2.29  | up | 23.60   | 66.75    | 28.86    | 66.68    | -0.97 | 0.63  |
| A 55_P207 | 7.59  | up | 73.46   | 72.96    | 81.17    | 621.48   | -0.16 | -0.07 |
| A 52_P574 | 2.10  | up |         | 21.66    | 10.78    | 22.82    |       | 0.51  |
| A 51_P394 | 4.55  | up | 45.63   | 146.11   | 122.61   | 562.58   | -1.64 | 0.14  |
| A 55_P203 | 2.54  | up | 83.96   | 417.46   | 214.04   | 549.66   | -1.92 | 0.49  |
| A 55_P199 | 2.36  | up | 49.06   | 62.74    | 22.47    | 53.42    | -0.09 | 0.36  |
| A 55_P210 | 2.27  | up | 54.54   | 444.50   | 251.92   | 578.34   | -2.71 | 0.42  |
| A 52_P293 | 5.62  | up |         |          | 13.34    | 75.67    |       |       |
| A 55_P210 | 2.82  | up |         | 13.35    | 15.87    | 45.22    |       | -0.11 |
| A 66_P126 | 2.26  | up | 27.73   | 24.69    | 14.65    | 33.40    | 0.03  | -0.03 |
| A 55_P198 | 2.29  | up | 39.35   | 15.88    | 13.07    | 30.20    | 0.76  | -0.45 |
| A 51_P307 | 2.40  | up |         | 18.10    | 11.30    | 27.33    |       | 0.35  |
| A 52_P441 | 6.52  | up |         |          | 11.51    | 75.75    |       |       |
| A 55_P201 | 2.24  | up | 408.03  | 954.00   | 705.74   | 1595.37  | -1.10 | 0.23  |
| A 55_P217 | 3.42  | up | 42.92   | 64.65    | 24.79    | 85.54    | -0.35 | 0.35  |
| A 55_P207 | 2.11  | up | 989.54  | 5348.24  | 3006.01  | 6389.10  | -2.11 | 0.43  |
| A 51_P313 | 2.07  | up | 285.45  | 20.60    | 250.28   | 523.03   | 0.06  | -3.64 |
| A 55_P217 | 2.17  | up | 166.22  | 62.60    | 51.03    | 112.01   | 0.91  | -0.40 |
| A 55_P207 | 2.57  | up | 471.40  | 387.91   | 225.61   | 584.20   | 0.09  | -0.09 |
| A 66_P106 | 5.05  | up | 2469.54 | 289.57   | 248.07   | 1265.71  | 1.95  | -1.05 |

|           |        |    |          |         |         |          |       |       |
|-----------|--------|----|----------|---------|---------|----------|-------|-------|
| A 55_P214 | 2.05   | up | 308.54   | 40.89   | 56.61   | 117.09   | 1.85  | -0.97 |
| A 55_P200 | 4.70   | up | 123.51   | 41.04   | 55.60   | 263.71   | 0.54  | -0.95 |
| A 52_P150 | 2.42   | up | 27.53    | 26.35   | 40.42   | 98.83    | -0.33 | -0.30 |
| A 66_P101 | 2.39   | up | 33.49    | 22.35   | 21.39   | 51.51    | 0.24  | -0.24 |
| A 55_P218 | 3.06   | up | 17.02    | 18.80   | 14.78   | 45.67    | -0.12 | 0.12  |
| A 55_P199 | 3.63   | up | 20.99    | 32.81   | 62.05   | 227.35   | -1.19 | -0.45 |
| A 55_P202 | 2.57   | up | 131.57   | 417.24  | 317.09  | 822.98   | -1.56 | 0.21  |
| A 55_P218 | 6.22   | up | 29.29    | 21.14   | 24.70   | 154.93   | 0.08  | -0.29 |
| A 55_P201 | 2.04   | up | 12.32    | 19.09   | 9.83    | 20.23    | -0.37 | 0.37  |
| A 55_P195 | 2.33   | up | 14.80    | 26.29   | 12.52   | 29.43    | -0.46 | 0.46  |
| A 55_P195 | 3.15   | up | 1018.51  | 308.06  | 331.89  | 1055.11  | 0.77  | -0.86 |
| A 55_P198 | 8.00   | up | 51.51    | 51.10   | 63.73   | 514.86   | -0.24 | -0.15 |
| A 55_P198 | 9.40   | up | 17.41    | 19.51   | 18.71   | 177.54   | -0.22 | 0.04  |
| A 51_P334 | 3.09   | up | 194.58   | 1724.14 | 895.75  | 2796.60  | -2.76 | 0.48  |
| A 51_P220 | 2.31   | up | 1176.36  | 157.95  | 94.07   | 219.52   | 2.58  | -0.22 |
| A 55_P197 | 7.63   | up | 2928.54  | 7766.67 | 1639.26 | 12632.85 | -0.75 | 0.75  |
| A 55_P218 | 2.55   | up | 1532.92  | 178.80  | 213.91  | 551.13   | 2.09  | -0.91 |
| A 51_P474 | 5.19   | up | 335.62   | 442.97  | 482.33  | 2527.15  | -0.55 | -0.05 |
| A 55_P196 | 2.34   | up | 13.26    | 39.38   | 11.16   | 26.38    | -0.53 | 1.14  |
| A 55_P201 | 42.94  | up | 451.34   | 1067.70 | 601.80  | 26083.41 | -0.92 | 0.42  |
| A 55_P200 | 138.29 | up | 26.58    | 16.73   | 16.91   | 2359.66  | 0.28  | -0.28 |
| A 51_P189 | 2.30   | up | 737.79   | 1987.47 | 835.27  | 1938.48  | -0.86 | 0.67  |
| A 51_P499 | 2.25   | up | 70.48    | 169.06  | 75.40   | 171.16   | -0.76 | 0.60  |
| A 55_P215 | 4.07   | up | 62.48    | 66.68   | 78.34   | 322.12   | -0.30 | -0.11 |
| A 55_P209 | 135.44 | up | 20.07    | 24.76   | 15.46   | 2113.69  | -0.20 | 0.20  |
| A 51_P162 | 4.13   | up | 320.69   | 831.82  | 450.37  | 1876.75  | -1.02 | 0.45  |
| A 66_P135 | 3.05   | up | 779.19   | 661.52  | 655.36  | 2018.77  | 0.07  | -0.07 |
| A 51_P413 | 2.35   | up | 610.70   | 1234.57 | 588.34  | 1393.91  | -0.57 | 0.54  |
| A 55_P208 | 2.24   | up | 32.72    | 72.44   | 39.22   | 88.78    | -0.79 | 0.45  |
| A 55_P195 | 8.61   | up | 30.53    | 26.08   | 24.74   | 214.94   | 0.06  | -0.06 |
| A 55_P200 | 4.00   | up | 36.74    | 80.09   | 149.05  | 602.06   | -1.66 | -0.44 |
| A 55_P197 | 2.41   | up | 660.14   | 103.24  | 136.50  | 332.27   | 1.56  | -1.02 |
| A 55_P215 | 2.74   | up | 545.04   | 470.87  | 573.24  | 1583.69  | -0.08 | -0.19 |
| A 55_P206 | 4.53   | up | 32.75    | 110.59  | 50.25   | 229.97   | -1.28 | 0.58  |
| A 51_P498 | 2.44   | up | 48.98    | 45.29   | 46.87   | 115.67   | -0.01 | -0.02 |
| A 55_P234 | 2.06   | up | 9.62     | 32.97   | 16.42   | 34.17    | -1.36 | 0.51  |
| A 51_P337 | 9.25   | up | 157.09   | 957.66  | 750.13  | 7002.14  | -2.52 | 0.19  |
| A 51_P120 | 26.84  | up | 65.10    | 31.57   | 52.26   | 1416.06  | 0.12  | -0.83 |
| A 51_P205 | 3.52   | up | 187.18   | 467.53  | 669.63  | 2380.73  | -1.67 | -0.25 |
| A 55_P204 | 43.52  | up | 349.50   | 914.79  | 509.50  | 22383.01 | -1.06 | 0.43  |
| A 52_P338 | 6.43   | up | 49.96    | 45.86   | 34.97   | 227.08   | 0.01  | -0.01 |
| A 55_P195 | 5.74   | up | 230.41   | 153.25  | 173.04  | 1002.10  | 0.17  | -0.32 |
| A 55_P218 | 2.00   | up | 485.14   | 61.99   | 86.97   | 175.58   | 1.90  | -0.97 |
| A 55_P196 | 2.02   | up | 159.83   | 207.16  | 235.05  | 479.48   | -0.55 | -0.08 |
| A 51_P461 | 2.47   | up | 58.54    | 188.57  | 57.49   | 143.21   | -0.70 | 1.08  |
| A 51_P265 | 2.08   | up | 71.67    | 75.68   | 56.51   | 118.80   | -0.09 | 0.09  |
| A 55_P211 | 2.15   | up | 344.78   | 535.11  | 261.99  | 567.59   | -0.37 | 0.37  |
| A 51_P506 | 8.49   | up | 70.56    | 12.94   | 17.72   | 151.77   | 0.96  | -1.39 |
| A 55_P200 | 2.55   | up | 69.05    | 130.27  | 68.01   | 174.91   | -0.54 | 0.48  |
| A 66_P125 | 4.41   | up | 12.77    | 39.53   | 11.55   | 51.38    | -0.87 | 0.87  |
| A 55_P210 | 6.84   | up | 226.43   | 599.18  | 138.63  | 957.75   | -0.75 | 0.75  |
| A 55_P217 | 2.25   | up | 58.60    | 282.60  | 266.50  | 604.54   | -2.32 | 0.05  |
| A 55_P196 | 6.00   | up | 4087.76  | 9612.65 | 2963.83 | 17960.39 | -0.67 | 0.67  |
| A 66_P121 | 4.66   | up |          | 42.97   | 64.96   | 305.22   |       | -0.29 |
| A 51_P468 | 11.64  | up | 21.66    | 42.30   | 30.04   | 352.85   | -0.81 | 0.26  |
| A 55_P213 | 2.13   | up | 362.18   | 5595.55 | 1955.13 | 4198.78  | -3.06 | 0.99  |
| A 55_P234 | 8.70   | up | 58.49    | 148.43  | 423.08  | 3714.11  | -2.19 | -0.75 |
| A 55_P218 | 2.39   | up |          | 33.07   | 18.91   | 45.63    |       | 0.41  |
| A 51_P185 | 2.76   | up | 19351.45 | 1547.54 | 1578.06 | 4402.21  | 2.80  | -0.74 |

|           |       |    |          |         |         |         |       |       |
|-----------|-------|----|----------|---------|---------|---------|-------|-------|
| A 51_P509 | 5.25  | up | 40368.50 | 930.04  | 949.49  | 5034.86 | 4.13  | -1.21 |
| A 51_P383 | 2.81  | up | 27313.07 | 2290.64 | 3318.79 | 9400.90 | 2.22  | -1.26 |
| A 51_P346 | 2.58  | up | 23.37    | 106.99  | 63.80   | 166.36  | -1.91 | 0.38  |
| A 55_P209 | 2.12  | up | 238.93   | 223.01  | 203.34  | 435.72  | 0.00  | 0.00  |
| A 55_P212 | 2.14  | up | 39.73    | 15.04   | 33.61   | 72.48   | 0.08  | -1.22 |
| A 66_P131 | 4.51  | up | 2065.18  | 49.25   | 42.64   | 193.91  | 4.32  | -0.97 |
| A 55_P206 | 5.54  | up | 48.23    | 36.03   | 37.13   | 207.80  | 0.15  | -0.17 |
| A 55_P200 | 2.18  | up | 65.13    | 138.76  | 11.97   | 26.30   | 0.62  | 1.81  |
| A 55_P205 | 2.54  | up |          | 64.27   | 11.58   | 29.68   |       | 1.82  |
| A 55_P239 | 2.69  | up | 14.26    | 29.67   | 21.15   | 57.51   | -0.90 | 0.25  |
| A 55_P214 | 2.51  | up |          | 50.77   | 22.55   | 57.21   |       | 0.60  |
| A 55_P207 | 2.34  | up | 39.71    | 51.73   | 17.25   | 40.74   | -0.05 | 0.43  |
| A 52_P118 | 2.11  | up | 23.00    | 21.64   | 10.79   | 22.94   | -0.01 | 0.01  |
| A 51_P355 | 5.34  | up | 39.47    | 23.76   | 35.37   | 190.50  | 0.04  | -0.59 |
| A 55_P210 | 5.45  | up | 44.35    | 19.52   | 31.53   | 173.47  | 0.21  | -0.88 |
| A 51_P267 | 3.39  | up | 60.38    | 169.41  | 99.43   | 340.48  | -1.19 | 0.39  |
| A 66_P127 | 2.08  | up | 129.22   | 119.96  | 106.25  | 223.10  | 0.00  | 0.00  |
| A 55_P212 | 2.64  | up | 15.11    |         | 12.90   | 34.36   | 0.07  |       |
| A 55_P201 | 2.51  | up | 24.59    | 15.19   | 20.68   | 52.32   | 0.09  | -0.51 |
| A 55_P212 | 2.19  | up | 21.01    | 128.76  | 48.05   | 105.99  | -1.84 | 0.88  |
| A 55_P205 | 3.97  | up | 55.53    | 55.50   | 50.04   | 200.76  | -0.05 | 0.05  |
| A 55_P203 | 6.98  | up | 684.14   | 1683.19 | 403.15  | 2839.71 | -0.70 | 0.70  |
| A 55_P207 | 39.28 | up | 40.55    | 28.66   | 32.38   | 1283.59 | 0.12  | -0.28 |
| A 55_P241 | 4.75  | up |          |         | 20.81   | 99.84   |       |       |
| A 52_P529 | 4.96  | up | 3577.32  | 74.77   | 104.88  | 524.59  | 3.86  | -1.62 |
| A 51_P337 | 6.89  | up | 88.18    | 44.17   | 41.81   | 290.67  | 0.45  | -0.45 |
| A 55_P217 | 2.34  | up | 55.85    | 68.88   | 46.75   | 110.66  | -0.20 | 0.20  |
| A 55_P231 | 2.18  | up | 55.27    | 433.85  | 533.79  | 1173.97 | -3.21 | -0.14 |
| A 51_P254 | 2.79  | up | 108.51   | 99.99   | 94.79   | 267.12  | 0.01  | -0.01 |
| A 51_P196 | 3.10  | up | 17.14    | 36.63   | 35.30   | 110.47  | -1.16 | 0.04  |
| A 55_P232 | 2.15  | up | 117.73   | 45.97   | 59.58   | 129.51  | 0.45  | -0.81 |
| A 51_P346 | 2.87  | up | 48.64    |         | 15.08   | 43.70   | 0.85  |       |
| A 51_P482 | 2.71  | up | 1042.93  | 703.43  | 767.71  | 2098.70 | 0.18  | -0.29 |
| A 51_P145 | 3.02  | up | 42.79    | 35.71   | 29.33   | 89.52   | 0.08  | -0.08 |
| A 55_P229 | 2.14  | up | 16799.49 | 1144.08 | 1266.15 | 2734.00 | 3.10  | -0.67 |
| A 51_P438 | 7.90  | up |          | 34.13   | 27.95   | 222.96  |       | 0.15  |
| A 55_P215 | 2.45  | up |          |         | 21.99   | 54.44   |       |       |
| A 55_P200 | 3.59  | up | 104.22   | 54.09   | 55.73   | 201.94  | 0.41  | -0.43 |
| A 51_P495 | 3.83  | up | 82.60    | 96.40   | 113.13  | 436.82  | -0.43 | -0.11 |
| A 51_P326 | 2.20  | up | 653.01   | 1316.14 | 478.69  | 1063.03 | -0.38 | 0.73  |
| A 55_P208 | 3.06  | up | 25.48    | 18.42   | 19.77   | 61.16   | 0.14  | -0.23 |
| A 51_P198 | 4.54  | up | 43.70    | 72.43   | 92.20   | 422.40  | -0.99 | -0.16 |
| A 66_P101 | 2.12  | up | 14.01    | 35.09   | 30.47   | 65.21   | -1.31 | 0.11  |
| A 66_P121 | 4.74  | up | 90.46    | 49.98   | 48.17   | 230.48  | 0.38  | -0.38 |
| A 51_P290 | 3.09  | up | 21.17    | 65.81   | 79.54   | 247.76  | -1.86 | -0.13 |
| A 55_P204 | 3.11  | up | 22.58    | 312.83  | 13.64   | 42.80   | -0.49 | 3.40  |
| A 51_P501 | 5.93  | up | 90.58    | 496.20  | 614.88  | 3679.68 | -2.70 | -0.14 |
| A 55_P213 | 2.12  | up | 48.40    | 70.38   | 75.85   | 162.01  | -0.68 | -0.04 |
| A 55_P209 | 2.23  | up | 302.58   | 911.58  | 662.80  | 1490.78 | -1.45 | 0.24  |
| A 51_P423 | 4.21  | up | 18.73    | 17.06   | 19.32   | 82.09   | -0.06 | -0.10 |
| A 51_P290 | 2.31  | up | 35.87    | 69.32   | 32.18   | 75.06   | -0.53 | 0.53  |
| A 51_P424 | 62.31 | up |          | 160.93  | 114.11  | 7176.20 |       | 0.26  |
| A 55_P203 | 58.03 | up | 19.59    | 21.04   | 13.03   | 763.13  | -0.10 | 0.10  |
| A 55_P201 | 52.99 | up | 71.82    | 65.86   | 56.39   | 3016.34 | 0.01  | -0.01 |
| A 52_P467 | 2.76  | up | 32.41    | 33.78   | 16.56   | 46.12   | -0.08 | 0.08  |
| A 55_P212 | 2.37  | up | 2567.34  | 3084.65 | 3266.78 | 7815.73 | -0.40 | -0.03 |
| A 55_P211 | 8.94  | up | 11.66    | 16.38   | 16.59   | 149.67  | -0.59 | 0.00  |
| A 51_P445 | 4.52  | up | 122.26   | 368.65  | 148.66  | 677.72  | -1.03 | 0.67  |
| A 51_P189 | 9.29  | up | 14.43    |         | 17.21   | 161.36  | -0.17 |       |

|           |        |    |          |          |          |          |       |       |
|-----------|--------|----|----------|----------|----------|----------|-------|-------|
| A 51_P185 | 2.01   | up | 64.70    | 629.20   | 103.34   | 209.23   | -1.26 | 2.12  |
| A 52_P425 | 6.29   | up | 62.85    | 62.30    | 39.36    | 249.73   | -0.04 | 0.04  |
| A 55_P216 | 4.41   | up | 192.21   | 87.27    | 60.91    | 271.24   | 0.52  | -0.52 |
| A 55_P196 | 4.43   | up | 81.40    | 195.73   | 324.53   | 1452.66  | -1.72 | -0.35 |
| A 55_P210 | 2.26   | up | 24.35    | 16.53    | 12.66    | 28.89    | 0.23  | -0.23 |
| A 51_P305 | 3.93   | up | 1109.73  | 932.63   | 237.00   | 940.74   | 0.16  | 0.01  |
| A 55_P219 | 2.33   | up |          | 23.45    | 32.47    | 76.35    |       | -0.22 |
| A 52_P601 | 8.97   | up |          | 49.45    | 47.75    | 432.61   |       | 0.04  |
| A 55_P211 | 34.60  | up | 395.58   | 1096.28  | 626.67   | 21888.11 | -1.16 | 0.41  |
| A 55_P209 | 2.90   | up | 256.49   | 279.24   | 153.25   | 448.59   | -0.11 | 0.11  |
| A 51_P278 | 28.59  | up | 37.96    |          | 21.29    | 614.42   | 0.38  |       |
| A 55_P211 | 4.36   | up | 77.30    | 48.86    | 54.52    | 239.75   | 0.21  | -0.35 |
| A 55_P208 | 2.34   | up | 71.39    | 383.48   | 197.05   | 465.81   | -2.03 | 0.49  |
| A 55_P218 | 2.71   | up | 31.14    | 51.38    | 13.65    | 37.38    | -0.16 | 0.66  |
| A 51_P391 | 3.70   | up | 12.57    |          | 19.36    | 72.34    | -0.35 |       |
| A 51_P484 | 7.90   | up | 103.72   | 132.09   | 103.23   | 823.30   | -0.26 | 0.19  |
| A 55_P210 | 2.89   | up |          | 79.91    | 46.20    | 134.97   |       | 0.41  |
| A 55_P216 | 2.25   | up | 15.50    | 29.12    | 16.71    | 38.01    | -0.60 | 0.41  |
| A 51_P349 | 2.02   | up | 303.39   | 160.27   | 152.75   | 310.80   | 0.41  | -0.41 |
| A 52_P338 | 5.75   | up | 413.30   | 1052.24  | 290.64   | 1685.57  | -0.72 | 0.72  |
| A 51_P338 | 2.70   | up |          | 17.70    | 17.79    | 48.51    |       | 0.01  |
| A 55_P225 | 6.92   | up | 66.64    | 15.45    | 19.12    | 133.65   | 0.86  | -1.15 |
| A 55_P195 | 2.02   | up | 693.95   | 911.50   | 837.59   | 1709.13  | -0.42 | 0.07  |
| A 55_P196 | 5.71   | up | 15973.43 | 43464.32 | 11836.08 | 68257.26 | -0.77 | 0.77  |
| A 51_P383 | 7.30   | up |          | 75.64    | 38.68    | 284.90   |       | 0.49  |
| A 51_P325 | 141.09 | up | 21.56    | 24.09    | 27.62    | 3933.88  | -0.35 | -0.09 |
| A 55_P196 | 4.29   | up | 93.27    | 90.54    | 71.21    | 308.03   | -0.03 | 0.03  |
| A 51_P436 | 2.89   | up | 21.16    | 57.89    | 15.02    | 43.73    | -0.56 | 1.00  |
| A 51_P174 | 4.93   | up | 34.70    | 286.29   | 112.76   | 560.66   | -2.46 | 0.68  |
| A 55_P200 | 2.28   | up | 26.51    | 40.66    | 37.45    | 86.26    | -0.65 | 0.07  |
| A 52_P251 | 3.82   | up |          | 15.47    | 15.92    | 61.34    |       | -0.01 |
| A 51_P279 | 3.33   | up | 39.21    | 54.13    | 40.25    | 135.35   | -0.34 | 0.22  |
| A 55_P195 | 2.18   | up | 82.58    | 540.82   | 184.62   | 406.08   | -1.80 | 1.01  |
| A 55_P206 | 2.31   | up | 96.05    | 73.27    | 34.34    | 80.18    | 0.24  | -0.05 |
| A 55_P203 | 12.15  | up | 1189.79  | 3465.54  | 2167.40  | 26586.45 | -1.29 | 0.35  |
| A 55_P203 | 5.17   | up | 140.24   | 166.87   | 185.43   | 968.17   | -0.42 | -0.07 |
| A 55_P203 | 8.98   | up | 406.48   | 1271.62  | 811.49   | 7354.60  | -1.41 | 0.33  |
| A 51_P136 | 2.01   | up |          | 32.79    | 28.28    | 57.29    |       | 0.12  |
| A 51_P405 | 2.04   | up | 146.90   | 219.28   | 86.37    | 178.14   | -0.17 | 0.51  |
| A 51_P157 | 2.87   | up | 113.25   | 111.38   | 163.30   | 473.39   | -0.34 | -0.27 |
| A 52_P401 | 2.21   | up |          | 213.30   | 75.70    | 169.12   |       | 0.94  |
| A 55_P210 | 3.38   | up | 167.45   | 47.92    | 23.89    | 81.54    | 1.34  | -0.37 |
| A 66_P121 | 16.83  | up | 29.80    | 66.09    | 37.44    | 636.18   | -0.83 | 0.42  |
| A 52_P449 | 2.06   | up | 22.81    | 43.57    | 36.64    | 76.09    | -0.90 | 0.14  |
| A 55_P204 | 2.81   | up | 70.78    | 78.04    | 16.64    | 47.22    | 0.26  | 0.50  |
| A 55_P200 | 2.44   | up |          | 28.09    | 15.30    | 37.66    |       | 0.45  |
| A 51_P462 | 6.45   | up | 171.53   | 86.11    | 74.91    | 487.66   | 0.45  | -0.45 |
| A 55_P207 | 12.91  | up | 51.48    | 631.05   | 191.45   | 2495.10  | -2.84 | 0.87  |
| A 55_P234 | 2.43   | up | 7472.30  | 760.44   | 1142.41  | 2803.19  | 1.99  | -1.21 |
| A 51_P407 | 9.65   | up | 41.36    | 105.32   | 17.13    | 166.93   | -0.72 | 0.72  |
| A 51_P487 | 77.56  | up | 253.26   | 34.81    | 181.86   | 14237.83 | 0.20  | -2.56 |
| A 55_P211 | 2.24   | up | 16.15    | 46.65    | 19.11    | 43.28    | -0.91 | 0.72  |
| A 52_P549 | 2.70   | up | 237.56   | 1213.72  | 793.00   | 2160.15  | -2.14 | 0.32  |

| [3-PDX-Credb_db] (normalized) | [4-double-TGdb_db] (normalized) | 1-controldb_m.txt:gPMA | 2-db_db.txt:gPMA | 3-PDX-Credb_db.txt:gPMA | 4-double-TGdb_db.txt:gPMA | GeneSymbol | Description           | GO biological process |
|-------------------------------|---------------------------------|------------------------|------------------|-------------------------|---------------------------|------------|-----------------------|-----------------------|
| -1.40                         | 0.00                            | P                      | P                | P                       | P                         | LOC10004   | PREDICTED: Mus mu     |                       |
| -0.56                         | 6.40                            | P                      | P                | P                       | P                         | Kng1       | Mus musc              | GO:000193             |
| 0.03                          | 4.68                            | A                      | P                | P                       | P                         | Mosc1      | Mus musc              | GO:000815             |
| -1.16                         | 2.07                            | P                      | P                | P                       | P                         | Scd1       | Mus musc              | GO:000662             |
| 0.13                          | 2.38                            | A                      | P                | P                       | P                         | Spp2       | Mus musc              | GO:000646             |
| 0.01                          | 1.19                            | P                      | P                | P                       | P                         |            | Putative uncharacteri |                       |
| 0.11                          | 2.73                            | P                      | P                | P                       | P                         | Apoa2      | Mus musc              | GO:000663             |
| -0.22                         | 0.80                            | P                      | P                | P                       | P                         | C3         | Mus musc              | GO:000179             |
| -0.01                         | 1.62                            | P                      | P                | P                       | P                         | Sec14l2    | Mus musc              | GO:000635             |
| -0.23                         | 2.18                            | P                      | P                | P                       | P                         | Gm10639    | Mus musc              | GO:000815             |
| -0.31                         | 1.04                            | P                      | P                | P                       | P                         | Nrg4       | Mus musculus neureg   |                       |
| 0.24                          | 6.45                            | A                      | P                | P                       | P                         | Fgb        | Mus musc              | GO:000716             |
| 0.01                          | 1.50                            | P                      | P                | P                       | P                         | Ccl21b     | Mus musc              | GO:000693             |
| -0.35                         | 4.34                            | P                      | P                | P                       | P                         | Cyp2e1     | Mus musc              | GO:005511             |
| 0.27                          | 1.29                            | P                      | P                | P                       | P                         | Itih1      | Mus musc              | GO:003021             |
| -0.92                         | 0.65                            | P                      | P                | P                       | P                         | Serpina3f  | Mus musc              | GO:003409             |
| -0.50                         | 0.50                            | P                      | P                | P                       | P                         | Maob       | Mus musc              | GO:001406             |
| -0.15                         | 2.05                            | P                      | P                | P                       | P                         | Gsta2      | Mus musc              | GO:000815             |
| -0.39                         | 0.92                            | P                      | P                | P                       | P                         | Sprr4      | Mus musc              | GO:000815             |
| 0.24                          | 2.41                            | A                      | P                | P                       | P                         | Abcc6      | Mus musc              | GO:000620             |
| -0.31                         | 1.40                            | P                      | P                | P                       | P                         | BC015286   | Mus musc              | GO:000815             |
| -0.33                         | 3.84                            | P                      | A                | P                       | P                         | Apoa1      | Mus musc              | GO:000193             |
| -0.29                         | 0.80                            | A                      | P                | P                       | P                         | 6530418L2  | Mus musc              | GO:000815             |
| -0.23                         | 2.18                            | A                      | P                | P                       | P                         | Wdr72      | Mus musc              | GO:000815             |
| 0.22                          | 2.09                            | A                      | P                | P                       | P                         | Ugt3a1     | Mus musc              | GO:000815             |
| -0.52                         | 0.52                            | P                      | P                | P                       | P                         | Dpt        | Mus musc              | GO:000715             |
| -0.73                         | 0.73                            | P                      | P                | P                       | P                         | AU022751   | Mus musc              | GO:000815             |
| -0.29                         | 0.74                            | P                      | P                | P                       | P                         | Ddah1      | Mus musc              | GO:000652             |
| -0.79                         | 0.82                            | A                      | P                | P                       | P                         | Itih4      | Mus musculus inter a  |                       |
| -0.06                         | 1.00                            | P                      | P                | P                       | P                         | Madcam1    | Mus musc              | GO:000268             |
| -0.22                         | 0.84                            | P                      | P                | P                       | P                         |            |                       |                       |
| -1.32                         | -0.13                           | P                      | P                | P                       | P                         | Hspa1a     | Mus musc              | GO:000072             |
| -1.19                         | 1.05                            | P                      | P                | P                       | P                         | 4931431B   | Mus musc              | GO:000815             |
| -0.68                         | 0.61                            | P                      | P                | P                       | P                         | 4930583H   | Mus musc              | GO:000815             |
| -0.13                         | 2.29                            | P                      | P                | P                       | P                         | Es22       | Mus musculus estera   |                       |
| -0.81                         | 0.25                            | P                      | P                | P                       | P                         | Prss12     | Mus musc              | GO:000650             |
| -0.65                         | 0.65                            | P                      | P                | P                       | P                         | Adc        | Mus musc              | GO:000659             |
| -0.03                         | 3.47                            | P                      | P                | P                       | P                         | Azgp1      | Mus musc              | GO:000695             |
| -0.02                         | 1.39                            | P                      | P                | P                       | P                         | Etnk2      | Mus musc              | GO:000170             |
| -0.25                         | 2.38                            | P                      | P                | P                       | P                         | Apol9b     | Mus musc              | GO:000815             |
| -0.41                         | 2.06                            | P                      | P                | P                       | P                         | Cd5l       | Mus musc              | GO:000691             |
| -0.38                         | 2.78                            | P                      | P                | P                       | P                         | Glycam1    | Mus musc              | GO:000715             |
| -1.28                         | 0.04                            | P                      | P                | P                       | P                         | Gzma       | Mus musc              | GO:000650             |
| -0.36                         | 0.68                            | P                      | P                | P                       | P                         | Rspo1      | Mus musc              | GO:001605             |
| 0.42                          | 1.52                            | P                      | P                | P                       | P                         | Ppara      | Mus musc              | GO:000600             |
| -0.53                         | 0.53                            | P                      | P                | P                       | P                         | Prm1       | Mus musc              | GO:000699             |
| -0.49                         | 3.68                            | P                      | P                | P                       | P                         | Serpina1e  | Mus musc              | GO:001028             |
| -1.17                         | -0.16                           | P                      | P                | P                       | P                         | Kcnj12     | Mus musc              | GO:000681             |
| -0.28                         | 1.90                            | P                      | P                | P                       | P                         | Fmo5       | Mus musc              | GO:005511             |
| -0.11                         | 3.37                            | P                      | P                | P                       | P                         | Gm7298     | PREDICTE              | GO:000815             |
| -0.07                         | 2.86                            | P                      | P                | P                       | P                         | Acox2      | Mus musc              | GO:000662             |

|       |       |   |   |   |   |           |                       |           |
|-------|-------|---|---|---|---|-----------|-----------------------|-----------|
| 0.26  | 1.39  | P | P | P | P | Uox       | Mus musc              | GO:000614 |
| -0.28 | 4.23  | P | P | P | P | Serpina1d | Mus musc              | GO:003409 |
| -0.57 | 0.51  | P | P | P | P | T2        | Mus musculus brachy   |           |
| -1.13 | -0.06 | P | P | P | P | D13Ert60  | Mus musculus 2 days   |           |
| 0.26  | 1.33  | A | P | P | P | A630095E  | Mus musculus RIKEN    |           |
| -0.81 | 0.50  | P | P | P | P | Cd163l1   | Mus musc              | GO:000815 |
| -1.49 | -0.22 | P | P | P | P | Baz1a     | Mus musc              | GO:000633 |
| 0.14  | 5.83  | P | P | P | P | Alb       | Mus musc              | GO:000681 |
| -0.52 | 0.52  | A | P | P | P | Wisp2     | Mus musc              | GO:000155 |
| -0.02 | 6.38  | P | P | P | P | Serpinc1  | Mus musc              | GO:000758 |
| -0.52 | 0.94  | P | P | P | P | Pglyrp1   | Mus musc              | GO:000691 |
| -0.12 | 1.27  | P | P | P | P | Gnmt      | Mus musc              | GO:000591 |
| -0.28 | 0.99  | P | P | P | P | LOC10004  | PREDICTED: Mus mu     |           |
| -0.10 | 2.72  | P | P | P | P | Cyp2d40   | Mus musc              | GO:000815 |
| -0.23 | 5.66  | P | P | P | P | Apob      | Mus musc              | GO:000170 |
| 0.05  | 2.43  | P | P | P | P | Ephx2     | Mus musc              | GO:000254 |
| -0.50 | 0.50  | P | P | P | P | Ccl6      | Mus musc              | GO:000693 |
| -1.44 | -0.09 | P | P | P | P |           | Q3U6K5_M              | GO:000038 |
| 0.03  | 1.86  | P | P | P | P | Cyp2c70   | Mus musc              | GO:000815 |
| -0.10 | 3.24  | A | P | P | P | Serpina6  | Mus musc              | GO:000681 |
| -0.19 | 2.31  | P | P | P | P | Aldh1l1   | Mus musc              | GO:000671 |
| -0.20 | 1.30  | P | P | P | P | Madcam1   | Mus musc              | GO:000268 |
| -0.29 | 5.81  | P | P | P | P | Akr1c6    | Mus musc              | GO:000669 |
| 0.29  | 7.61  | P | A | P | P | Apoc3     | Mus musc              | GO:000664 |
| -1.42 | 0.01  | P | P | P | P | Retnla    | Mus musculus resisti  |           |
| 0.11  | 1.98  | P | P | P | P | Grem1     | Mus musc              | GO:000152 |
| -0.80 | 1.39  | P | P | P | P | Mosc1     | Mus musc              | GO:000815 |
| -0.68 | 0.68  | P | P | P | P | Nr5a1     | Mus musc              | GO:000155 |
| 0.21  | 2.03  | P | P | P | P | Tmprss6   | Mus musc              | GO:000650 |
| 0.02  | 5.15  | P | P | P | P | Apoc4     | Mus musc              | GO:000681 |
| -0.10 | 0.90  | P | P | P | P | Sh3bp1    | Mus musc              | GO:000710 |
| -0.73 | 1.80  | P | P | P | P | Chst4     | Mus musc              | GO:000591 |
| -0.95 | 5.31  | P | P | P | P | Hc        | Mus musc              | GO:000170 |
| -1.39 | 1.42  | P | P | P | P | Alas2     | Mus musc              | GO:000678 |
| 0.14  | 4.70  | P | P | P | P | Apoc1     | Mus musc              | GO:000664 |
| -0.64 | 0.80  | P | P | P | P | Aspa      | Mus musc              | GO:000608 |
| -0.45 | 0.75  | P | P | P | P | Nrn1      | Mus musc              | GO:000739 |
| -0.22 | 0.92  | P | P | P | P | Cpxm1     | Mus musc              | GO:000650 |
| -0.22 | 0.81  | P | P | P | P | Ccl19     | Mus musc              | GO:000693 |
| -0.15 | 2.94  | P | P | P | P | Itih3     | Mus musc              | GO:003021 |
| -2.12 | 5.06  | P | P | P | P | Hp        | Mus musc              | GO:000188 |
| -1.62 | -0.26 | P | P | P | P |           | Mus musculus immuni   |           |
| -0.25 | 1.19  | P | P | P | P | Adamdec1  | Mus musc              | GO:000650 |
| 0.04  | 1.63  | P | P | P | P | 261050710 | Mus musc              | GO:000815 |
| 0.06  | 1.26  | P | P | P | P | Cdo1      | Mus musc              | GO:000759 |
| -0.89 | 1.12  | P | P | P | P | Gm4951    | Mus musc              | GO:000815 |
| -0.42 | 5.10  | P | P | P | P | Serpina1a | Mus musc              | GO:000648 |
| -0.56 | 0.56  | P | P | P | P |           | Putative uncharacteri |           |
| -0.10 | 1.42  | P | P | P | P | AI132487  | Mus musc              | GO:000681 |
| -0.63 | 0.63  | P | P | P | P | Prb1      | Mus musc              | GO:000815 |
| -0.23 | 0.83  | A | P | P | P | Krtap11-1 | Mus musculus keratin  |           |
| -0.30 | 5.02  | P | P | P | P | Serpina1a | Mus musc              | GO:000648 |
| -0.49 | 0.54  | P | P | P | P | Hmgcs2    | Mus musc              | GO:000669 |
| 0.04  | 2.40  | P | P | P | P | Slc22a1   | Mus musc              | GO:000681 |
| 0.15  | 4.28  | P | P | P | P | Serpinf2  | Mus musc              | GO:000693 |
| -0.52 | 0.52  | P | P | P | P | Prpmp5    | Mus musc              | GO:000815 |
| 0.62  | 5.78  | A | A | P | P | Rdh7      | Mus musc              | GO:000815 |
| -0.43 | 0.88  | P | P | P | P | Cdk15     | Mus musc              | GO:000648 |
| -0.72 | 4.96  | P | A | P | P | Gstm3     | Mus musc              | GO:000815 |



|       |       |   |   |   |   |           |                       |           |
|-------|-------|---|---|---|---|-----------|-----------------------|-----------|
| -0.20 | 2.80  | A | P | P | P | 220000111 | Mus musc              | GO:000815 |
| 0.03  | 1.08  | P | P | P | P | Fam176a   | Mus musc              | GO:000691 |
| -0.25 | 1.02  | P | P | P | P | Ccdc11    | Mus musc              | GO:000815 |
| -0.06 | 2.79  | P | P | P | P | Proz      | protein Z,            | GO:000650 |
| -0.28 | 1.01  | P | P | P | P | Mgst1     | Mus musc              | GO:000674 |
| -0.14 | 1.12  | P | P | P | P | Vnn3      | Mus musc              | GO:000680 |
| -0.38 | 2.10  | P | P | P | P | Raet1e    | Mus musc              | GO:000695 |
| -0.10 | 0.97  | P | A | P | P | Pdzk1     | Mus musculus PDZ d    |           |
| -1.17 | 0.11  | P | P | P | P | Serpina3f | Mus musc              | GO:003409 |
| -0.75 | 0.62  | P | P | P | P | Gm6683    | PREDICTE              | GO:000815 |
| -0.37 | 0.65  | P | P | P | P | Ugt3a2    | Mus musc              | GO:000815 |
| -1.32 | -0.31 | P | P | P | P | LOC10004  | PREDICTED: Mus mu     |           |
| -1.12 | 0.74  | P | P | P | P | Kmo       | Mus musc              | GO:000815 |
| 0.58  | 4.46  | A | A | P | P | Uroc1     | Mus musc              | GO:000654 |
| -0.55 | 0.55  | P | P | P | P | Slc6a12   | Mus musc              | GO:000681 |
| -0.04 | 1.64  | P | P | P | P | Cyp2d12   | Mus musc              | GO:000815 |
| -0.01 | 1.69  | P | P | P | P | Wdr86     | Mus musc              | GO:000815 |
| -0.53 | 0.66  | P | P | P | P | Ear11     | Mus musc              | GO:000815 |
| 0.25  | 2.48  | A | A | P | P | Masp2     | Mus musc              | GO:000650 |
| -0.39 | 0.83  | P | P | P | P | Serpina3n | Mus musc              | GO:000695 |
| -0.39 | 0.75  | P | P | P | P | 2210023G  | Mus musc              | GO:000815 |
| 0.35  | 2.11  | A | A | P | P | Fgl1      | Mus musc              | GO:000710 |
| -0.74 | 0.74  | P | P | P | P |           | Putative uncharacteri |           |
| 0.16  | 2.45  | P | P | P | P | Abcg5     | Mus musc              | GO:000681 |
| -0.13 | 1.36  | P | P | P | P | Qprt      | Mus musc              | GO:000815 |
| -0.09 | 1.99  | P | P | P | P | Pax2      | Mus musc              | GO:000012 |
| 0.00  | 1.83  | P | P | P | P | Ccl21a    | Mus musc              | GO:000691 |
| -0.19 | 1.04  | P | P | P | P | Slc35d1   | Mus musculus solute   |           |
| -0.66 | 0.66  | P | P | P | P | AW493563  | VP01_12_E18.x1 FH V   |           |
| -0.17 | 5.75  | P | P | P | P | Cyp2a21-r | PREDICTED: Mus mu     |           |
| -2.02 | -0.16 | P | P | P | P |           | Ig kappa chain V-V re |           |
| 0.25  | 1.35  | P | P | P | P | Gstm6     | Mus musc              | GO:000815 |
| -0.20 | 1.69  | P | P | P | P | Saa1      | Mus musc              | GO:000695 |
| 0.20  | 3.61  | P | P | P | P | Apoa2     | Mus musc              | GO:000663 |
| -0.70 | 0.65  | P | P | P | P | Slc14a2   | Mus musc              | GO:001584 |
| -0.26 | 1.05  | P | P | P | P | Pygl      | Mus musc              | GO:000597 |
| -0.15 | 1.62  | P | P | P | P | Gm5226    | PREDICTE              | GO:000815 |
| -0.32 | 3.37  | P | P | P | P | Apoc2     | Mus musc              | GO:000662 |
| -0.78 | 0.78  | P | P | P | P | Gm12962   | PREDICTE              | GO:000815 |
| -0.60 | 0.60  | P | P | P | P | Gja5      | Mus musc              | GO:000150 |
| 0.07  | 2.99  | P | P | P | P | Slc27a2   | Mus musc              | GO:000003 |
| -0.51 | 0.56  | A | P | P | P | Oit3      | Mus musculus oncop    |           |
| -0.14 | 2.05  | P | P | P | P | Aadac     | Mus musc              | GO:000815 |
| -0.49 | 0.86  | P | P | P | P | Igf1      | Mus musc              | GO:000164 |
| -1.14 | 0.09  | P | P | P | P | Il6       | Mus musc              | GO:000178 |
| -0.42 | 0.77  | P | P | P | P | Art4      | Mus musc              | GO:000815 |
| 0.82  | 3.31  | A | A | P | P | Gm7231    | PREDICTE              | GO:000815 |
| 0.11  | 1.61  | A | P | P | P | Wdr64     | Mus musc              | GO:000815 |
| -0.81 | 0.37  | P | P | P | P |           | Putative uncharacteri |           |
| -0.75 | 0.45  | P | P | P | P | Dnase1    | Mus musc              | GO:000630 |
| -0.35 | 0.91  | A | P | P | P | Ddah1     | Mus musc              | GO:000652 |
| 0.20  | 2.91  | A | A | P | P | Apob      | Mus musc              | GO:000170 |
| -0.23 | 0.94  | P | P | P | P | Thrsp     | Mus musculus thyroid  |           |
| -1.06 | 0.72  | P | P | P | P |           | 1TPZ_A Chain A, Cry   |           |
| -0.43 | 0.65  | P | P | P | P | C4b       | Mus musc              | GO:000695 |
| -0.06 | 0.99  | P | P | P | P | Fabp2     | Mus musc              | GO:000663 |
| -0.72 | 0.40  | P | P | P | P | A630033H  | Mus musc              | GO:000710 |
| -0.89 | 0.47  | P | P | P | P | Haa0      | Mus musc              | GO:000815 |
| -1.29 | 1.05  | P | P | P | P | Adam32    | Mus musc              | GO:000650 |

|       |      |   |   |   |   |           |                       |           |
|-------|------|---|---|---|---|-----------|-----------------------|-----------|
| -0.52 | 0.52 | P | P | P | P | Gm8061    | PREDICTED: Mus mu     |           |
| -0.54 | 1.70 | P | P | P | P | Ces2      | Mus musc              | GO:000110 |
| 0.30  | 1.57 | P | P | P | P | Apom      | Mus musc              | GO:00068  |
| -0.33 | 0.93 | P | P | P | P | Acat3     | Mus musculus acetyl   |           |
| -0.25 | 1.37 | P | P | P | P | Cyp3a13   | Mus musc              | GO:00551  |
| 0.45  | 2.31 | P | P | P | P | Gys2      | Mus musc              | GO:00059  |
| -0.21 | 1.15 | P | P | P | P | Cfi       | Mus musc              | GO:000650 |
| -0.08 | 2.55 | P | P | P | P | Masp2     | Mus musc              | GO:000650 |
| -0.61 | 0.42 | P | P | P | P |           |                       |           |
| -0.63 | 0.59 | P | P | P | P | Sulf1     | Mus musc              | GO:000679 |
| -0.77 | 0.89 | P | P | P | P | Ces5      | Mus musc              | GO:000815 |
| 0.15  | 3.15 | P | P | P | P | Fgl1      | Mus musc              | GO:000710 |
| -0.04 | 3.19 | P | P | P | P | Mst1      | Mus musc              | GO:000650 |
| -0.48 | 1.15 | P | P | P | P | Aldh1a1   | Mus musc              | GO:000207 |
| -0.99 | 0.22 | P | P | P | P | Angptl7   | Mus musc              | GO:000710 |
| -1.51 | 1.42 | P | P | P | P | Hbb-b1    | Mus musc              | GO:00068  |
| -0.68 | 0.68 | P | P | P | P | Olf97     | Mus musc              | GO:000710 |
| 0.05  | 2.43 | P | P | P | P | Fbp1      | Mus musc              | GO:00059  |
| -0.70 | 0.53 | P | P | P | P | Gdpd2     | Mus musc              | GO:000607 |
| -0.42 | 5.00 | P | P | P | P | Serpina1c | Mus musc              | GO:003409 |
| -0.29 | 6.82 | P | P | P | P | Cyp2a4    | Mus musc              | GO:00551  |
| -0.60 | 0.60 | P | P | P | P | Osgin1    | Mus musc              | GO:000815 |
| -0.58 | 0.58 | P | P | P | P | Bst1      | Mus musc              | GO:000815 |
| 0.11  | 2.13 | P | P | P | P | Cyp4a12b  | Mus musc              | GO:005511 |
| -0.50 | 6.58 | P | P | P | P | Pzp       | Mus musculus pregna   |           |
| -0.45 | 1.59 | P | P | P | P | Inmt      | Mus musculus indolet  |           |
| -0.10 | 1.51 | P | P | P | P | Cyp2d11   | Mus musc              | GO:000815 |
| -0.54 | 0.69 | P | P | P | P | Cfb       | Mus musc              | GO:000650 |
| -0.45 | 0.71 | P | P | P | P | Ak3l1     | Mus musc              | GO:000613 |
| -0.16 | 2.95 | P | P | P | P | Trfr2     | Mus musc              | GO:000650 |
| 0.44  | 2.44 | P | P | P | P | Asgr1     | Mus musc              | GO:000689 |
| -0.63 | 0.63 | P | P | P | P | AI507597  | Mus musc              | GO:000815 |
| 0.08  | 1.53 | P | P | P | P | C8g       | Mus musc              | GO:00068  |
| -0.58 | 1.60 | P | P | P | P | Gm10639   | Mus musc              | GO:000815 |
| 0.01  | 1.30 | P | P | P | P | Cyp2c37   | Mus musc              | GO:00551  |
| -0.51 | 0.53 | P | P | P | P | B230114P  | Mus musc              | GO:000815 |
| -0.19 | 3.02 | P | P | P | P | Aldob     | Mus musc              | GO:000609 |
| -0.12 | 4.63 | P | P | P | P | Cyp2d26   | Mus musc              | GO:004249 |
| 0.25  | 2.07 | P | P | P | P | Uox       | Mus musc              | GO:000614 |
| -0.43 | 5.01 | P | P | P | P |           |                       |           |
| -0.42 | 2.26 | P | P | P | P | Aspg      | Mus musc              | GO:000652 |
| -0.17 | 2.35 | P | P | P | P | Fmo5      | Mus musc              | GO:005511 |
| -0.50 | 0.50 | P | P | P | P | Dux       | Mus musculus double   |           |
| 0.08  | 1.10 | P | P | P | P | Pemt      | Mus musc              | GO:000664 |
| -0.65 | 0.65 | P | P | P | P | Cxcl9     | Mus musc              | GO:000695 |
| -0.35 | 0.71 | P | P | P | P | Clca2     | Mus musc              | GO:000682 |
| -0.68 | 0.42 | P | P | P | P | Serpine1  | Mus musc              | GO:004200 |
| -0.96 | 2.13 | P | P | P | P | Hrg       | Mus musc              | GO:005197 |
| -0.48 | 0.87 | P | P | P | P | Ch25h     | Mus musc              | GO:000661 |
| -0.93 | 1.21 | P | P | P | P | F830016B  | Mus musc              | GO:000815 |
| -1.38 | 1.39 | P | P | P | P |           | hemoglobin, beta adul |           |
| -0.05 | 1.12 | P | P | P | P | Creb3l3   | Mus musc              | GO:000635 |
| -1.05 | 1.53 | P | P | P | P | Hba-a1    | Mus musc              | GO:000170 |
| 0.29  | 2.51 | A | P | P | P | Pck1      | Mus musc              | GO:000609 |
| -0.26 | 3.28 | P | P | P | P | Serpind1  | Mus musc              | GO:000750 |
| -0.54 | 0.54 | P | P | P | P | Fn1       | Mus musc              | GO:000152 |
| 0.75  | 3.87 | P | P | P | P | A930009L  | Mus musc              | GO:000815 |
| -0.41 | 0.84 | A | P | P | P | Nnmt      | Mus musculus nicotin  |           |
| -0.73 | 0.73 | P | P | P | P | Slc2a2    | Mus musc              | GO:00068  |

|       |       |   |   |   |   |           |                      |
|-------|-------|---|---|---|---|-----------|----------------------|
| -1.20 | 1.20  | P | P | P | P | Cox6a2    | Mus musculus cytoch  |
| -0.74 | 0.74  | P | P | P | P | Prp2      | Mus musculus proline |
| -0.38 | 0.99  | P | P | P | P | Mrap      | Mus musc GO:005081   |
| -0.15 | 0.93  | P | P | P | P | Raet1b    | Mus musc GO:000283   |
| -0.08 | 1.01  | P | P | P | P | Ges2      | Mus musc GO:000110   |
| -1.20 | 0.97  | P | P | P | P | Trpm5     | Mus musc GO:000681   |
| -0.15 | 2.32  | P | P | P | P | Acsml     | Mus musc GO:000662   |
| -1.74 | -0.62 | P | P | P | P |           | immunoglobulin heavy |
| -0.67 | 0.67  | A | P | P | P | Muc6      | mucin 6, g GO:000813 |
| -0.25 | 1.18  | P | P | P | P | Fst       | Mus musc GO:000727   |
| -0.60 | 0.73  | A | P | P | P | Apol7c    | Mus musc GO:000813   |
| -1.18 | 0.05  | P | P | P | P | LOC10004  | PREDICTED: Mus mu    |
| -1.02 | 0.06  | P | P | P | P | Kynu      | Mus musc GO:000650   |
| -0.04 | 2.38  | P | P | P | P | Cyp3a11   | Mus musc GO:005511   |
| -0.21 | 2.24  | P | P | P | P |           |                      |
| -0.39 | 1.37  | P | P | P | P | Slc15a2   | Mus musc GO:000681   |
| -0.20 | 0.86  | P | P | P | P | Acat2     | Mus musc GO:000813   |
| -0.07 | 1.33  | P | A | P | P | Kcnk9     | Mus musc GO:000681   |
| -0.09 | 1.24  | P | P | P | P | Pdzk1     | Mus musculus PDZ d   |
| -0.56 | 0.56  | P | P | P | P | Ear12     | Mus musc GO:000813   |
| -0.12 | 1.87  | P | P | P | P | Cyp4a31   | Mus musc GO:000813   |
| -1.38 | 1.42  | P | P | P | P | Hbb-b2    | Mus musc GO:000681   |
| -0.12 | 5.17  | P | P | P | P | Slc27a5   | Mus musc GO:000161   |
| 0.69  | 2.94  | A | A | P | P | AW111846  | Mus musculus adult n |
| -1.15 | 1.15  | P | P | P | P | Fam151a   | Mus musc GO:000813   |
| -0.55 | 2.24  | P | P | P | P | Pipox     | Mus musc GO:004665   |
| -0.38 | 0.85  | P | P | P | P | Sh3gl3    | Mus musc GO:000689   |
| 0.14  | 1.26  | P | P | P | P | Aqp8      | Mus musc GO:000681   |
| -0.11 | 1.37  | P | P | P | P | Cyp4a10   | Mus musc GO:000663   |
| -0.04 | 1.60  | P | P | P | P | Itih2     | Mus musc GO:003021   |
| -0.45 | 0.66  | P | P | P | P | C78859    | Mus musc GO:000813   |
| -0.76 | 0.76  | P | A | P | P | Aspdh     | Mus musc GO:000674   |
| -0.18 | 1.26  | P | P | P | P | Dhcr24    | Mus musc GO:000669   |
| -0.38 | 1.21  | P | P | P | P | Clec4g    | Mus musc GO:000813   |
| -0.55 | 0.55  | P | P | P | P | 221001911 | Mus musc GO:000813   |
| -0.15 | 2.83  | A | P | P | P | Slc6a13   | Mus musc GO:000681   |
| 0.49  | 1.78  | A | A | P | P | Ttn       | Mus musc GO:000170   |
| -0.41 | 1.43  | P | P | P | P | Gm7969    | PREDICTE GO:000813   |
| 0.11  | 2.04  | P | P | P | P | Apof      | Mus musc GO:000662   |
| -0.75 | 0.38  | P | P | P | P | Serpina3g | Mus musc GO:000691   |
| -0.14 | 1.47  | P | P | P | P | Lrrtm2    | Mus musc GO:000813   |
| 0.16  | 2.35  | P | P | P | P | Gckr      | Mus musc GO:000000   |
| -0.11 | 0.97  | P | P | P | P |           | Mus musculus adult n |
| -0.45 | 1.79  | P | P | P | P | Gm7969    | PREDICTE GO:000813   |
| 0.13  | 1.75  | P | P | P | P | Gulo      | Mus musc GO:000905   |
| -1.14 | 0.49  | P | P | P | P | Spr2a2    | Mus musc GO:000813   |
| 0.14  | 2.71  | P | P | P | P | Cyp26b1   | Mus musc GO:000170   |
| 0.04  | 1.13  | P | P | P | P | LOC10004  | PREDICTED: Mus mu    |
| -0.24 | 0.92  | P | P | P | P | Ccl19     | Mus musc GO:000693   |
| 0.06  | 2.14  | P | P | P | P | Mmrn1     | Mus musc GO:000813   |
| -0.60 | 0.61  | P | P | P | P | Fabp7     | Mus musc GO:000190   |
| -0.26 | 5.70  | A | P | P | P | Ahsg      | Mus musc GO:000150   |
| -0.61 | 5.25  | P | P | P | P | H2-Q10    | Mus musc GO:000247   |
| -0.26 | 5.47  | P | P | P | P | Mup2      | Mus musculus major t |
| -0.97 | 0.50  | P | P | P | P | Il1rap    | Mus musc GO:000710   |
| 0.03  | 1.28  | P | P | P | P | Arhgap36  | Mus musc GO:000813   |
| 0.00  | 3.16  | P | P | P | P | Mst1      | Mus musc GO:000650   |
| -0.67 | 1.51  | P | P | P | P | Fut7      | Mus musc GO:000648   |
| 0.17  | 3.38  | P | A | P | P | Adh4      | Mus musc GO:000600   |

|       |       |   |   |   |   |           |                       |           |
|-------|-------|---|---|---|---|-----------|-----------------------|-----------|
| -0.50 | 0.50  | P | P | P | P | Ccl9      | Mus musc              | GO:000693 |
| -0.64 | 2.01  | P | P | P | P | Afm       | Mus musc              | GO:000681 |
| -1.06 | 1.08  | P | P | P | P | Serpina3m | Mus musc              | GO:003409 |
| 0.35  | 2.50  | P | P | P | P | F2        | Mus musc              | GO:000650 |
| -0.64 | 0.54  | P | P | P | P | Kcna2     | Mus musc              | GO:000681 |
| -1.99 | -0.01 | P | P | P | P | Eif2s3x   | Mus musc              | GO:000641 |
| 0.22  | 1.44  | A | P | P | P | Gm10768   | Mus musc              | GO:000815 |
| -0.04 | 3.13  | A | P | P | P | C4bp      | Mus musc              | GO:000693 |
| -0.41 | 4.70  | P | P | P | P | Serpina1e | Mus musc              | GO:001028 |
| -0.77 | 0.76  | P | P | P | P | Zdhhc22   | Mus musc              | GO:000815 |
| -0.38 | 4.46  | P | A | P | P | Gltpd2    | Mus musc              | GO:000815 |
| -0.21 | 1.91  | P | P | P | P | Cyp2c38   | Mus musc              | GO:005511 |
| -0.49 | 0.74  | P | P | P | P | Igf1      | Mus musc              | GO:000164 |
| -1.28 | 0.16  | P | P | P | P | Ecel1     | Mus musc              | GO:000650 |
| 0.35  | 2.24  | P | A | P | P | Agxt2l1   | Mus musc              | GO:000815 |
| -0.19 | 2.79  | P | P | P | P | Asgr2     | Mus musc              | GO:000689 |
| -0.41 | 1.13  | A | P | P | P | Plin5     | Mus musculus perilipi |           |
| -0.41 | 0.76  | P | P | P | P | Rspo3     | Mus musc              | GO:001605 |
| -0.50 | 0.51  | P | P | P | P | Ang2      | Mus musculus angioge  |           |
| -1.15 | 1.37  | P | P | P | P | Ubd       | Mus musculus ubiquit  |           |
| -0.01 | 1.43  | A | P | P | P | Tnnt2     | Mus musc              | GO:000693 |
| -0.86 | 1.93  | P | P | P | P | A030001D  | Mus musc              | GO:000815 |
| -0.07 | 0.94  | P | P | P | P | Sord      | Mus musc              | GO:000606 |
| -1.13 | 1.39  | P | P | P | P | Hba-a2    | Mus musc              | GO:000170 |
| -0.49 | 2.37  | A | P | P | P | Aldh1a7   | Mus musc              | GO:000815 |
| 0.09  | 7.23  | P | P | P | P | Hpx       | Mus musc              | GO:000263 |
| -0.34 | 1.76  | P | P | P | P | Cyp2c67   | Mus musc              | GO:000815 |
| -0.97 | 0.56  | P | P | P | P | Ccl7      | Mus musc              | GO:000693 |
| -0.68 | 1.62  | P | P | P | P | F10       | Mus musc              | GO:000650 |
| -0.07 | 1.12  | P | P | P | P | Fgl1      | Mus musc              | GO:000716 |
| 0.01  | 1.94  | A | P | P | P | Prodh2    | Mus musc              | GO:000653 |
| -0.22 | 1.51  | P | P | P | P | Mfsd2a    | Mus musc              | GO:000681 |
| -0.56 | 0.56  | P | P | P | P | Ear2      | Mus musc              | GO:000693 |
| -1.16 | 0.05  | P | P | P | P | Gm15698   | Mus musculus predict  |           |
| -0.35 | 3.25  | P | P | P | P | Trf       | Mus musc              | GO:000681 |
| 0.07  | 2.44  | P | P | P | P | Gsta1     | Mus musc              | GO:000674 |
| -0.33 | 2.83  | P | P | P | P | Trf       | Mus musc              | GO:000681 |
| -0.12 | 0.89  | A | P | P | P | Cyp4f15   | Mus musc              | GO:000815 |
| -0.86 | 0.17  | P | P | P | P | Maf       | Mus musc              | GO:000181 |
| 0.27  | 1.79  | P | P | P | P | Rgn       | Mus musculus reguca   |           |
| -0.57 | 0.57  | A | P | P | P | Thbs4     | Mus musc              | GO:000715 |
| -1.39 | 0.37  | P | P | P | P | Mrap2     | Mus musc              | GO:000815 |
| -0.42 | 3.65  | P | P | P | P | Serpina1d | Mus musc              | GO:003409 |
| -0.14 | 0.91  | P | P | P | P | Id4       | Mus musc              | GO:000008 |
| -1.75 | -0.26 | P | P | P | P | Phox2b    | Mus musc              | GO:000170 |
| -0.45 | 0.84  | A | P | P | P | Tnn       | Mus musc              | GO:000716 |
| -0.67 | 2.02  | P | P | P | P | G6pc      | Mus musc              | GO:000597 |
| -0.87 | 2.82  | P | P | P | P | Itih4     | Mus musculus inter a  |           |
| -0.64 | 0.64  | P | P | P | P | AU040972  | H3052C06              | GO:000815 |
| -1.92 | 1.35  | P | P | P | P |           | Mus musculus rearrar  |           |
| -0.20 | 6.08  | P | P | P | P | Fabp1     | Mus musc              | GO:000681 |
| -0.58 | 0.58  | P | P | P | P | Bst1      | Mus musc              | GO:000815 |
| -0.32 | 1.12  | P | P | P | P | Mgst1     | Mus musc              | GO:000674 |

| GO cellular component  | GO molecular function | Chromosome End Index_Avadis_ | Chromosome Number_Avadis_ | Chromosome Start Index_Avadis_ | Chromosome Strand_Avadis_ | Cytoband   | Ensembl ID | EntrezGeneID |
|------------------------|-----------------------|------------------------------|---------------------------|--------------------------------|---------------------------|------------|------------|--------------|
| sculus similar to prec |                       | 113884088                    | chr13                     | 113884029                      | -                         | mm 13qD2.2 |            | 100045268    |
| GO:00055               | GO:00020              | 23081759                     | chr16                     | 23081700                       | +                         | mm 16qB1   | ENSMUST    | 16644        |
| GO:00057               | GO:00036              | 186611226                    | chr1                      | 186611167                      | -                         | mm 1qH5    | ENSMUST    | 66112        |
| GO:00057               | GO:00047              | 44469446                     | chr19                     | 44469387                       | -                         | mm 19qC3   | ENSMUST    | 20249        |
| GO:00055               | GO:00036              | 90323003                     | chr1                      | 90322944                       | +                         | mm 1qD     | ENSMUST    | 75396        |
| zed protein [Source:   |                       | 14523482                     | chr9                      | 14523423                       | +                         | mm 9qA2    | ENSMUST    | 000000989    |
| GO:00055               | GO:00080              | 173156504                    | chr1                      | 173156445                      | +                         | mm 1qH3    | ENSMUST    | 11807        |
| GO:00055               | GO:00048              | 57343475                     | chr17                     | 57343416                       | -                         | mm 17qD    | ENSMUST    | 12266        |
| GO:00056               | GO:00052              | 3997333                      | chr11                     | 3997274                        | -                         | mm 11qA1   | ENSMUST    | 67815        |
| GO:00055               | GO:00036              | 78153302                     | chr9                      | 78153243                       | +                         | mm 9qE1    | ENSMUST    | 100042314    |
| GO:00055               | GO:00080              | 55068089                     | chr9                      | 55068030                       | -                         | mm 9qB     | ENSMUST    | 83961        |
| GO:00055               | GO:00051              | 82846393                     | chr3                      | 82846334                       | -                         | mm 3qE3    | ENSMUST    | 110135       |
| GO:00055               | GO:00051              | 41775333                     | chr4                      | 41775274                       | +                         | mm 4qA5    | ENSMUST    | 100042493    |
| GO:00001               | GO:00044              | 147960687                    | chr7                      | 147960628                      | +                         | mm 7qF5    | ENSMUST    | 13106        |
| GO:00055               | GO:00048              | 31742434                     | chr14                     | 31742375                       | -                         | mm 14qB    | ENSMUST    | 16424        |
| GO:00055               | GO:00036              | 105492615                    | chr12                     | 105492556                      | +                         | mm 12qE    | ENSMUST    | 238393       |
| GO:00057               | GO:00081              | 16286486                     | chrX                      | 16286427                       | -                         | mm XqA1.1  | ENSMUST    | 109731       |
| GO:00056               | GO:00043              | 78178915                     | chr9                      | 78178856                       | -                         | mm 9qE1    | ENSMUST    | 14858        |
| GO:00055               | GO:00036              | 92304254                     | chr3                      | 92304195                       | -                         | mm 3qF1    | ENSMUST    | 229562       |
| GO:00056               | GO:00001              | 53231923                     | chr7                      | 53231864                       | -                         | mm 7qB4    | ENSMUST    | 27421        |
| GO:00055               | GO:00036              | 107362480                    | chr8                      | 107362421                      | +                         | mm 8qD3    | ENSMUST    | 234669       |
| GO:00055               | GO:00048              | 46037980                     | chr9                      | 46037921                       | +                         | mm 9qA5.2  | ENSMUST    | 11806        |
| GO:00055               | GO:00036              | 105520880                    | chr3                      | 105520821                      | +                         | mm 3qF2.2  | ENSMUST    | 109050       |
| GO:00055               | GO:00036              | 74130635                     | chr9                      | 74130576                       | +                         | mm 9qD     | ENSMUST    | 546144       |
| GO:00055               | GO:00036              | 9244723                      | chr15                     | 9244664                        | +                         | mm 15qA1   | ENSMUST    | 105887       |
| GO:00055               | GO:00036              | 166753762                    | chr1                      | 166753703                      | +                         | mm 1qH2.2  | ENSMUST    | 56429        |
| GO:00055               | GO:00036              | 5658422                      | chrX                      | 5658363                        | -                         | mm XqA1.   | ENSMUST    | 102991       |
| GO:00057               | GO:00082              | 145516211                    | chr3                      | 145516152                      | +                         | mm 3qH2    | ENSMUST    | 69219        |
| GO:00057               | GO:00055              | 31711281                     | chr14                     | 31711222                       | +                         | mm 14qB    | ENSMUST    | 16427        |
| GO:00160               | GO:00055              | 79129191                     | chr10                     | 79129132                       | +                         | mm 10qC1   | ENSMUST    | 17123        |
|                        |                       | 87805246                     | chr5                      | 87805187                       | -                         | mm 5qE1    |            |              |
| GO:00057               | GO:00001              | 35107176                     | chr17                     | 35107117                       | -                         | mm 17qB1   | ENSMUST    | 193740       |
| GO:00055               | GO:00036              | 135345676                    | chr7                      | 135345617                      | -                         | mm 7qF3    |            | 70973        |
| GO:00055               | GO:00036              | 51192414                     | chr3                      | 51192355                       | -                         | mm 3qC     | ENSMUST    | 67749        |
| GO:00057               | GO:00040              | 95725266                     | chr8                      | 95725207                       | -                         | mm 8qC5    | ENSMUST    | 13897        |
| GO:00055               | GO:00038              | 123209468                    | chr3                      | 123209409                      | +                         | mm 3qG1    | ENSMUST    | 19142        |
| GO:00057               | GO:00038              | 128623373                    | chr4                      | 128623314                      | -                         | mm 4qD2.2  | ENSMUST    | 242669       |
| GO:00055               | 76(extracel           | 138431304                    | chr5                      | 138431245                      | +                         | mm 5qG2    | ENSMUST    | 12007        |
| GO:00055               | GO:00036              | 135276862                    | chr1                      | 135276803                      | +                         | mm 1qE4    | ENSMUST    | 214253       |
| GO:00055               | GO:00036              | 77566810                     | chr15                     | 77566751                       | +                         | mm 15qE1   | ENSMUST    | 71898        |
| GO:00055               | GO:00050              | 87174882                     | chr3                      | 87174823                       | +                         | mm 3qF1    | ENSMUST    | 11801        |
| GO:00058               | GO:00055              | 103393398                    | chr15                     | 103393339                      | -                         | mm 15qF3   | ENSMUST    | 14663        |
| GO:00055               | GO:00038              | 113884094                    | chr13                     | 113884035                      | -                         | mm 13qD2   | ENSMUST    | 14938        |
| GO:00055               | GO:00051              | 124686329                    | chr4                      | 124686270                      | +                         | mm 4qD2.2  | ENSMUST    | 192199       |
| GO:00056               | GO:00036              | 85637252                     | chr15                     | 85637193                       | +                         | mm 15qE2   |            | 19013        |
| GO:00007               | GO:00036              | 10796509                     | chr16                     | 10796450                       | -                         | mm 16qA1   | ENSMUST    | 19118        |
| GO:00055               | GO:00048              | 105185349                    | chr12                     | 105185290                      | -                         | mm 12qE    | ENSMUST    | 20704        |
| GO:00160               | GO:00052              | 60884615                     | chr11                     | 60884556                       | +                         | mm 11qB2   | ENSMUST    | 16515        |
| GO:00057               | GO:00044              | 97459192                     | chr3                      | 97459133                       | +                         | mm 3qF2.2  | ENSMUST    | 14263        |
| GO:00055               | GO:00036              | 121737552                    | chr6                      | 121737493                      | +                         | mm 6qF1    |            | 640530       |
| GO:00057               | GO:00039              | 9058200                      | chr14                     | 9058141                        | -                         | mm 14qA1   | ENSMUST    | 93732        |

|                                                                                       |           |           |           |           |    |         |         |           |           |
|---------------------------------------------------------------------------------------|-----------|-----------|-----------|-----------|----|---------|---------|-----------|-----------|
| GO:000573                                                                             | GO:000484 | 146290847 | chr3      | 146290788 | +  | mm      | 3qH2    | ENSMUST   | 22262     |
| GO:000557                                                                             | GO:000484 | 105002989 | chr12     | 105002930 | -  | mm      | 12qE    | ENSMUST   | 20703     |
| ury 2 (T2), mRNA [NM                                                                  | 8615528   | chr17     | 8615469   | +         | mm | 17qA1   | ENSMUST | 21331     |           |
| pregnant adult female oviduct cDNA, RIKEN full-length enriched library, clone:E230022 |           |           |           |           |    |         |         |           | 52673     |
| GO:0005576(extracel                                                                   | 36443486  | chr9      | 36443427  | -         | mm | 9qA4    | ENSMUST | 235973    |           |
| GO:000557                                                                             | GO:000367 | 147417030 | chr7      | 147416971 | +  | mm      | 7qF4    | ENSMUST   | 244233    |
| GO:000022                                                                             | GO:000557 | 55994057  | chr12     | 55993998  | -  | mm      | 12qC1   |           | 217578    |
| GO:000557                                                                             | GO:000557 | 90901657  | chr5      | 90901598  | +  | mm      | 5qE1    | ENSMUST   | 11657     |
| GO:000557                                                                             | GO:000557 | 163658776 | chr2      | 163658717 | +  | mm      | 2qH3    | ENSMUST   | 22403     |
| GO:000557                                                                             | GO:000484 | 162932624 | chr1      | 162932565 | +  | mm      | 1qH2.1  | ENSMUST   | 11905     |
| GO:000557                                                                             | GO:000512 | 19475721  | chr7      | 19475662  | +  | mm      | 7qA3    | ENSMUST   | 21946     |
| GO:000564                                                                             | GO:000554 | 46863042  | chr17     | 46862894  | -  | mm      | 17qC    | ENSMUST   | 14711     |
| sculus hypothetical pr                                                                | 164394045 | chr2      | 164393986 | +         | mm | 2qH3    |         |           | 100045919 |
| GO:000557                                                                             | GO:000367 | 82590347  | chr15     | 82590288  | -  | mm      | 15qE1   | ENSMUST   | 71754     |
| GO:000564                                                                             | GO:000557 | 8012756   | chr12     | 8012697   | +  | mm      | 12qA1   | ENSMUST   | 238055    |
| GO:000573                                                                             | GO:000028 | 66703273  | chr14     | 66703214  | -  | mm      | 14qD1   | ENSMUST   | 13850     |
| GO:000557                                                                             | GO:000512 | 83402056  | chr11     | 83401997  | -  | mm      | 11qC    | ENSMUST   | 20305     |
| GO:000078                                                                             | GO:000016 | 111479067 | chr4      | 111479008 | -  | mm      | 4qD1    |           |           |
| GO:000557                                                                             | GO:000367 | 40228028  | chr19     | 40227969  | -  | mm      | 19qC3   | ENSMUST   | 226105    |
| GO:000557                                                                             | GO:000484 | 104884939 | chr12     | 104884880 | -  | mm      | 12qE    | ENSMUST   | 12401     |
| GO:000573                                                                             | GO:000003 | 90549150  | chr6      | 90549091  | +  | mm      | 6qD1    | ENSMUST   | 107747    |
| GO:001602                                                                             | GO:000557 | 79131271  | chr10     | 79131212  | +  | mm      | 10qC1   | ENSMUST   | 17123     |
| GO:000557                                                                             | GO:000430 | 4456487   | chr13     | 4456428   | +  | mm      | 13qA1   | ENSMUST   | 83702     |
| GO:000557                                                                             | GO:000367 | 46041193  | chr9      | 46041134  | -  | mm      | 9qA5.2  | ENSMUST   | 11814     |
| GO:000557                                                                             | GO:000512 | 48844506  | chr16     | 48844447  | +  | mm      | 16qB5   | ENSMUST   | 57262     |
| GO:000557                                                                             | GO:000512 | 113589286 | chr2      | 113589227 | -  | mm      | 2qE4    | ENSMUST   | 23892     |
| GO:000573                                                                             | GO:000367 | 186610771 | chr1      | 186610712 | -  | mm      | 1qH5    | ENSMUST   | 66112     |
| GO:000564                                                                             | GO:000367 | 38548239  | chr2      | 38548180  | -  | mm      | 2qB     | ENSMUST   | 26423     |
| GO:000588                                                                             | GO:000382 | 78270317  | chr15     | 78270258  | -  | mm      | 15qE1   | ENSMUST   | 71753     |
| GO:0005576(extracel                                                                   | 20263965  | chr7      | 20263609  | -         | mm | 7qA3    | ENSMUST | 11425     |           |
| GO:000564                                                                             | GO:000509 | 78736927  | chr15     | 78736868  | +  | mm      | 15qE1   | ENSMUST   | 20401     |
| GO:000013                                                                             | GO:000814 | 112553204 | chr8      | 112553145 | -  | mm      | 8qD3    | ENSMUST   | 26887     |
| GO:000557                                                                             | GO:000484 | 34838958  | chr2      | 34838899  | -  | mm      | 2qB     | ENSMUST   | 15139     |
| GO:000573                                                                             | GO:000382 | 147005052 | chrX      | 147004993 | +  | mm      | XqF3    | ENSMUST   | 11656     |
| GO:0005576(extracel                                                                   | 20274890  | chr7      | 20274831  | -         | mm | 7qA3    | ENSMUST | 11812     |           |
| GO:000564                                                                             | GO:000404 | 73119110  | chr11     | 73119051  | -  | mm      | 11qB4   | ENSMUST   | 11484     |
| GO:0005886(plasma r                                                                   | 36818000  | chr13     | 36817941  | -         | mm | 13qA3   | ENSMUST | 68404     |           |
| GO:000557                                                                             | GO:000418 | 130216670 | chr2      | 130216611 | -  | mm      | 2qF1    | ENSMUST   | 56264     |
| GO:000557                                                                             | GO:000512 | 42248585  | chr4      | 42248526  | +  | mm      | 4qA5    | ENSMUST   | 24047     |
| GO:000557                                                                             | GO:000484 | 31721894  | chr14     | 31721835  | -  | mm      | 14qB    | ENSMUST   | 16426     |
| GO:000557                                                                             | GO:000382 | 112099104 | chr8      | 112099045 | -  | mm      | 8qD3    | ENSMUST   | 15439     |
| oglobulin kappa chain                                                                 | 70622273  | chr6      | 70622214  | +         | mm | 6qC1    | ENSMUST | 000001034 |           |
| GO:000557                                                                             | GO:000367 | 69181532  | chr14     | 69181473  | -  | mm      | 14qD2   |           | 58860     |
| GO:000557                                                                             | GO:000367 | 59011363  | chr11     | 59011304  | -  | mm      | 11qB1.3 |           | 72203     |
| GO:000588                                                                             | GO:000557 | 46873479  | chr18     | 46873420  | -  | mm      | 18qC    | ENSMUST   | 12583     |
| GO:000557                                                                             | GO:000367 | 60407465  | chr18     | 60407406  | +  | mm      | 18qD3   | ENSMUST   | 240327    |
| GO:000557                                                                             | GO:000484 | 105091878 | chr12     | 105091819 | -  | mm      | 12qE    | ENSMUST   | 20700     |
| zed protein [Source:                                                                  | 101672089 | chr8      | 101672030 | +         | mm | 8qD1    | ENSMUST | 000000984 |           |
| GO:000573                                                                             | GO:000367 | 110094720 | chr12     | 110094661 | +  | mm      | 12qF1   | ENSMUST   | 104910    |
| GO:000557                                                                             | GO:000367 | 132157231 | chr6      | 132157172 | -  | mm      | 6qG1    | ENSMUST   | 381833    |
| associated protein 1                                                                  | 89570480  | chr16     | 89570421  | -         | mm | 16qC3.3 |         |           | 16693     |
| GO:000557                                                                             | GO:000484 | 105092038 | chr12     | 105091979 | -  | mm      | 12qE    | ENSMUST   | 20700     |
| GO:000573                                                                             | GO:000382 | 98114655  | chr3      | 98114596  | +  | mm      | 3qF2.2  | ENSMUST   | 15360     |
| GO:000588                                                                             | GO:000521 | 12845321  | chr17     | 12845262  | -  | mm      | 17qA1   | ENSMUST   | 20517     |
| GO:000557                                                                             | GO:000484 | 75245311  | chr11     | 75245252  | -  | mm      | 11qB5   | ENSMUST   | 18816     |
| GO:000557                                                                             | GO:000367 | 132262248 | chr6      | 132262189 | -  | mm      | 6qG1    | ENSMUST   | 381832    |
| GO:000573                                                                             | GO:000382 | 127321205 | chr10     | 127321146 | -  | mm      | 10qD3   | ENSMUST   | 54150     |
| GO:000557                                                                             | GO:000016 | 59387841  | chr1      | 59387782  | +  | mm      | 1qC1.3  | ENSMUST   | 271697    |
| GO:000573                                                                             | GO:000436 | 107766674 | chr3      | 107766615 | -  | mm      | 3qF2.3  | ENSMUST   | 14864     |

|                        |          |           |       |           |   |    |         |         |           |
|------------------------|----------|-----------|-------|-----------|---|----|---------|---------|-----------|
| GO:00055               | GO:00036 | 35166894  | chr14 | 35165215  | - | mm | 14qB    | ENSMUST | 69134     |
| GO:00055               | GO:00036 | 82042974  | chr6  | 82042915  | + | mm | 6qC3    | ENSMUST | 232146    |
| GO:00055               | GO:00036 | 74519443  | chr18 | 74519384  | + | mm | 18qE2   | ENSMUST | 74453     |
| GO:00055               | GO:00038 | 13075942  | chr8  | 13075883  | + | mm | 8qA1    | ENSMUST | 66901     |
| GO:00056               | GO:00043 | 138104905 | chr6  | 138104846 | + | mm | 6qG1    | ENSMUST | 56615     |
| GO:00056               | GO:00167 | 23589353  | chr10 | 23587033  | + | mm | 10qA4   | ENSMUST | 26464     |
| GO:00058               | GO:00467 | 21903584  | chr10 | 21903525  | + | mm | 10qA3   | ENSMUST | 379043    |
| GO:00057               | GO:00051 | 96674623  | chr3  | 96674564  | + | mm | 3qF2.1  | ENSMUST | 59020     |
| GO:00055               | GO:00036 | 105459048 | chr12 | 105458989 | + | mm | 12qE    | ENSMUST | 238393    |
| GO:00055               | GO:00036 | 54767961  | chr14 | 54767902  | - | mm | 14qC2   |         | 626545    |
| GO:00055               | GO:00036 | 9300262   | chr15 | 9300203   | + | mm | 15qA1   | ENSMUST | 223337    |
| sculus similar to Chai |          | 70653980  | chr6  | 70653921  | + | mm | 6qC1    | ENSMUST | 100047628 |
| GO:00057               | GO:00044 | 177590732 | chr1  | 177590673 | + | mm | 1qH4    | ENSMUST | 98256     |
| GO:00055               | GO:00036 | 90314396  | chr6  | 90314337  | + | mm | 6qD1    | ENSMUST | 243537    |
| GO:00058               | GO:00053 | 121315600 | chr6  | 121315541 | + | mm | 6qF1    | ENSMUST | 14411     |
| GO:00055               | GO:00036 | 82388501  | chr15 | 82388259  | + | mm | 15qE1   | ENSMUST | 380997    |
| GO:00055               | GO:00036 | 24218184  | chr5  | 24218125  | - | mm | 5qA3    | ENSMUST | 269633    |
| GO:00055               | GO:00045 | 51875123  | chr14 | 51875064  | - | mm | 14qC1   | ENSMUST | 93726     |
| GO:00055               | GO:00038 | 147977914 | chr4  | 147977855 | + | mm | 4qE2    | ENSMUST | 17175     |
| GO:00002               | GO:00048 | 105651977 | chr12 | 105651918 | + | mm | 12qE    | ENSMUST | 20716     |
| GO:00055               | GO:00036 | 107492338 | chr8  | 107492279 | + | mm | 8qD3    | ENSMUST | 72361     |
| GO:00055               | GO:00051 | 42295065  | chr8  | 42285914  | - | mm | 8qA4    |         | 234199    |
| zed protein [Source:   |          | 101672138 | chr8  | 101672079 | + | mm | 8qD1    | ENSMUST | 000000984 |
| GO:00056               | GO:00001 | 85057652  | chr17 | 85057593  | - | mm | 17qE4   | ENSMUST | 27409     |
| GO:00057               | GO:00038 | 134251534 | chr7  | 134251475 | - | mm | 7qF3    | ENSMUST | 67375     |
| GO:00056               | GO:00036 | 44909954  | chr19 | 44909895  | + | mm | 19qC3   | ENSMUST | 18504     |
| GO:00055               | GO:00051 | 42232176  | chr4  | 42232117  | + | mm | 4qA5    | ENSMUST | 18829     |
| GO:0016020(membran     |          | 102844382 | chr4  | 102844323 | - | mm | 4qC6    | ENSMUST | 242585    |
| P01 Mus musculus cl    |          | 67244877  | chr6  | 67244818  | + | mm | 6qC1    |         | 101365    |
| sculus predicted gene  |          | 27737398  | chr7  | 27737339  | + | mm | 7qA3    |         | 330491    |
| egion K2 Precursor; Fr |          | 69714576  | chr6  | 69714517  | - | mm | 6qC1    | ENSMUST | 000001033 |
| GO:00057               | GO:00043 | 107741825 | chr3  | 107741766 | - | mm | 3qF2.3  | ENSMUST | 14867     |
| GO:00055               | GO:00055 | 53996129  | chr7  | 53996070  | - | mm | 7qB4    | ENSMUST | 20208     |
| GO:00055               | GO:00080 | 173156379 | chr1  | 173156320 | + | mm | 1qH3    | ENSMUST | 11807     |
| GO:00058               | GO:00152 | 78342970  | chr18 | 78342911  | - | mm | 18qE3   | ENSMUST | 27411     |
| GO:00056               | GO:00001 | 71291914  | chr12 | 71291855  | - | mm | 12qC2   | ENSMUST | 110095    |
| GO:00055               | GO:00036 | 26423916  | chr17 | 26423752  | - | mm | 17qA3.3 |         | 383229    |
| GO:00055               | GO:00036 | 20257086  | chr7  | 20257027  | - | mm | 7qA3    | ENSMUST | 11813     |
| GO:00055               | GO:00036 | 131203353 | chr4  | 131203294 | - | mm | 4qD2.3  |         | 100039799 |
| GO:00058               | GO:00052 | 96857408  | chr3  | 96857349  | + | mm | 3qF2.1  | ENSMUST | 14613     |
| GO:00057               | GO:00001 | 126413949 | chr2  | 126413890 | + | mm | 2qF1    | ENSMUST | 26458     |
| GO:0005634(nucleus)    |          | 58886313  | chr10 | 58886254  | - | mm | 10qB4   | ENSMUST | 18302     |
| GO:00055               | GO:00040 | 59843944  | chr3  | 59843885  | + | mm | 3qD     | ENSMUST | 67758     |
| GO:00055               | GO:00051 | 87393640  | chr10 | 87393581  | + | mm | 10qC1   | ENSMUST | 16000     |
| GO:00055               | GO:00051 | 30346426  | chr5  | 30346367  | + | mm | 5qB1    | ENSMUST | 16193     |
| GO:00055               | GO:00036 | 136797033 | chr6  | 136796974 | - | mm | 6qG1    | ENSMUST | 109978    |
| GO:00055               | GO:00036 | 15050573  | chr7  | 15050514  | - | mm | 7qA1    |         | 638251    |
| GO:00055               | GO:00036 | 177738905 | chr1  | 177738846 | + | mm | 1qH4    | ENSMUST | 75820     |
| zed protein [Source:   |          | 11451645  | chr2  | 11451586  | + | mm | 2qA1    | ENSMUST | 000001004 |
| GO:00055               | GO:00037 | 4040024   | chr16 | 4039965   | + | mm | 16qA1   | ENSMUST | 13419     |
| GO:00057               | GO:00082 | 145556862 | chr3  | 145556803 | + | mm | 3qH2    | ENSMUST | 69219     |
| GO:00056               | GO:00055 | 8023253   | chr12 | 8023194   | + | mm | 12qA1   | ENSMUST | 238055    |
| GO:0005634(nucleus)    |          | 104561708 | chr7  | 104561649 | - | mm | 7qE1    | ENSMUST | 21835     |
| stal Structure Of Iigp |          | 60381630  | chr18 | 60381571  | + | mm | 18qD3   |         |           |
| i6(complement activa   |          | 34865387  | chr17 | 34865328  | - | mm | 17qB1   | ENSMUST | 12268     |
| GO:00057               | GO:00052 | 122602335 | chr3  | 122602276 | + | mm | 3qG1    | ENSMUST | 14079     |
| GO:00055               | GO:00036 | 104368763 | chrX  | 104368704 | + | mm | XqD     | ENSMUST | 213438    |
| GO:00056               | GO:00003 | 84230755  | chr17 | 84230696  | - | mm | 17qE4   | ENSMUST | 107766    |
| GO:00055               | GO:00036 | 25946691  | chr8  | 25946632  | - | mm | 8qA2    | ENSMUST | 353188    |

|                       |           |           |           |           |    |       |         |                   |
|-----------------------|-----------|-----------|-----------|-----------|----|-------|---------|-------------------|
| sculus predicted gene | 135890494 | chrX      | 135890435 | +         | mm | XqF1  |         | 666359            |
| GO:000551             | GO:000361 | 107378164 | chr8      | 107378105 | +  | mm    | 8qD3    | ENSMUST 234671    |
| GO:0005576            | (extracel | 35267106  | chr17     | 35267047  | -  | mm    | 17qB1   | ENSMUST 55938     |
| GO:000574             | GO:001674 | 13118229  | chr17     | 13118170  | -  | mm    | 17qA1   | ENSMUST 224530    |
| GO:000578             | GO:000449 | 138335471 | chr5      | 138335412 | -  | mm    | 5qG2    | ENSMUST 13113     |
| GO:000562             | GO:000431 | 142371216 | chr6      | 142371157 | -  | mm    | 6qG2    | ENSMUST 232493    |
| GO:000551             | GO:000382 | 129578224 | chr3      | 129578165 | +  | mm    | 3qG3    | ENSMUST 12630     |
| GO:000551             | GO:000382 | 147978515 | chr4      | 147978456 | +  | mm    | 4qE2    | ENSMUST 17175     |
|                       |           | 47101919  | chr18     | 47101860  | -  | mm    | 18qC    |                   |
| GO:000562             | GO:000382 | 12849566  | chr1      | 12849507  | +  | mm    | 1qA3    | ENSMUST 240725    |
| GO:000551             | GO:000409 | 107458567 | chr8      | 107458508 | +  | mm    | 8qD3    | ENSMUST 234673    |
| GO:000551             | GO:000510 | 42276905  | chr8      | 42276846  | -  | mm    | 8qA4    | ENSMUST 234199    |
| GO:000551             | GO:000382 | 107987331 | chr9      | 107987272 | +  | mm    | 9qF2    | ENSMUST 15235     |
| GO:000562             | GO:000173 | 20717823  | chr19     | 20717764  | +  | mm    | 19qB    | ENSMUST 11668     |
| GO:000551             | GO:000361 | 147870043 | chr4      | 147869984 | -  | mm    | 4qE2    | ENSMUST 654812    |
| GO:000588             | GO:000534 | 110961164 | chr7      | 110961105 | -  | mm    | 7qE3    | ENSMUST 15129     |
| GO:001602             | GO:000481 | 37368622  | chr17     | 37368563  | -  | mm    | 17qB1   | ENSMUST 258505    |
| GO:000562             | GO:001678 | 62966234  | chr13     | 62966175  | -  | mm    | 13qB3   | ENSMUST 14121     |
| GO:000574             | GO:000808 | 97934219  | chrX      | 97934160  | +  | mm    | XqC3    | ENSMUST 71584     |
| GO:000551             | GO:000486 | 105133224 | chr12     | 105133165 | -  | mm    | 12qE    | ENSMUST 20702     |
| GO:000578             | GO:000449 | 27099939  | chr7      | 27099880  | +  | mm    | 7qA3    | ENSMUST 13086     |
| GO:000551             | GO:000361 | 121970136 | chr8      | 121970077 | +  | mm    | 8qE1    | ENSMUST 71839     |
| GO:000588             | GO:000382 | 44233524  | chr5      | 44233465  | +  | mm    | 5qB3    | ENSMUST 12182     |
| 4(oxidation           | GO:000449 | 115111639 | chr4      | 115111580 | +  | mm    | 4qD1    | ENSMUST 13118     |
| GO:000551             | GO:000486 | 128433690 | chr6      | 128433631 | -  | mm    | 6qF3    | ENSMUST 11287     |
| GO:000574             | GO:000816 | 55120829  | chr6      | 55120770  | -  | mm    | 6qB3    | ENSMUST 21743     |
| GO:000551             | GO:000361 | 82219706  | chr15     | 82219647  | -  | mm    | 15qE1   | ENSMUST 545123    |
| GO:000551             | GO:000382 | 34993858  | chr17     | 34993502  | -  | mm    | 17qB1   | ENSMUST 14962     |
| GO:000574             | GO:000016 | 101139523 | chr4      | 101139464 | +  | mm    | 4qC6    | ENSMUST 11639     |
| GO:000574             | GO:000481 | 138028705 | chr5      | 138028646 | +  | mm    | 5qG2    | ENSMUST 50765     |
| GO:001602             | GO:000481 | 69871314  | chr11     | 69871255  | +  | mm    | 11qB3   | ENSMUST 11889     |
| GO:000551             | GO:000361 | 141171519 | chr4      | 141171460 | +  | mm    | 4qE1    | ENSMUST 100165    |
| GO:000551             | GO:000521 | 25354235  | chr2      | 25354176  | -  | mm    | 2qA3    | ENSMUST 69379     |
| GO:000551             | GO:000361 | 78153258  | chr9      | 78153199  | +  | mm    | 9qE1    | ENSMUST 100042314 |
| GO:000578             | GO:000449 | 40086526  | chr19     | 40086467  | +  | mm    | 19qC3   | ENSMUST 13096     |
| GO:000551             | GO:000361 | 106370663 | chr10     | 106370604 | -  | mm    | 10qD1   | 402735            |
| GO:000562             | GO:000382 | 49549467  | chr4      | 49549408  | -  | mm    | 4qB1    | ENSMUST 230163    |
| GO:000551             | GO:000449 | 82620634  | chr15     | 82620575  | -  | mm    | 15qE1   | ENSMUST 76279     |
| GO:000574             | GO:000484 | 146294263 | chr3      | 146294204 | +  | mm    | 3qH2    | ENSMUST 22262     |
|                       |           | 105056068 | chr12     | 105056009 | -  | mm    | 12qE    |                   |
| GO:000562             | GO:000384 | 113365754 | chr12     | 113365695 | +  | mm    | 12qF1   | ENSMUST 104816    |
| GO:000578             | GO:000449 | 97456469  | chr3      | 97456410  | +  | mm    | 3qF2.2  | ENSMUST 14263     |
| homeobox (Dux), mR    | 57694079  | chr10     | 57694020  | -         | mm | 10qB4 |         | 664783            |
| GO:000562             | GO:000460 | 59784219  | chr11     | 59784160  | -  | mm    | 11qB1   | ENSMUST 18618     |
| GO:000551             | GO:000512 | 92752250  | chr5      | 92752191  | -  | mm    | 5qE2    | ENSMUST 17329     |
| GO:000588             | GO:000522 | 144460568 | chr3      | 144460509 | -  | mm    | 3qH2    | ENSMUST 80797     |
| GO:000551             | GO:000425 | 137537500 | chr5      | 137537441 | -  | mm    | 5qG2    | ENSMUST 18787     |
| GO:000551             | GO:000486 | 22961484  | chr16     | 22961425  | +  | mm    | 16qB1   | ENSMUST 94175     |
| GO:000551             | GO:000156 | 34548779  | chr19     | 34548720  | -  | mm    | 19qC1   | ENSMUST 12642     |
| GO:000551             | GO:000361 | 60460035  | chr18     | 60459976  | +  | mm    | 18qD3   | 240328            |
| t minor chain Gene [S | 110976438 | chr7      | 110976379 | -         | mm | 7qE3  | ENSMUST | 00000239          |
| GO:000562             | GO:000361 | 80547139  | chr10     | 80547080  | -  | mm    | 10qC1   | ENSMUST 208677    |
| GO:000583             | GO:000534 | 32184014  | chr11     | 32183955  | +  | mm    | 11qA4   | ENSMUST 15122     |
| GO:000562             | GO:000016 | 172984366 | chr2      | 172984307 | +  | mm    | 2qH3    | ENSMUST 18534     |
| 6(blood co            | GO:000486 | 17343603  | chr16     | 17343544  | +  | mm    | 16qA3   | ENSMUST 15160     |
| GO:000551             | GO:000202 | 71632175  | chr1      | 71632116  | -  | mm    | 1qC3    | ENSMUST 14268     |
| GO:000551             | GO:000361 | 72338337  | chr15     | 72338278  | -  | mm    | 15qD3   | 402733            |
| GO:000562             | GO:000811 | 48400427  | chr9      | 48400368  | -  | mm    | 9qA5.3  | ENSMUST 18113     |
| GO:000574             | GO:000514 | 28627075  | chr3      | 28627016  | +  | mm    | 3qA3    | ENSMUST 20526     |



|                        |           |           |           |           |    |        |         |           |           |
|------------------------|-----------|-----------|-----------|-----------|----|--------|---------|-----------|-----------|
| GO:000573              | GO:000414 | 135349219 | chr7      | 135349160 | -  | mm     | 7qF3    | ENSMUST   | 12862     |
| rich protein 2 (Prp2), | 132550516 | chr6      | 132550457 | +         | mm | 6qG1   | ENSMUST | 83380     |           |
| GO:000573              | GO:000361 | 90749917  | chr16     | 90749858  | +  | mm     | 16qC3   | ENSMUST   | 77037     |
| GO:000588              | GO:004670 | 22093744  | chr10     | 22093685  | +  | mm     | 10qA3   | ENSMUST   | 19369     |
| GO:000551              | GO:000361 | 107378317 | chr8      | 107378258 | +  | mm     | 8qD3    |           | 234671    |
| GO:000588              | GO:000481 | 150257456 | chr7      | 150257434 | -  | mm     | 7qF5    | ENSMUST   | 56843     |
| GO:000573              | GO:000016 | 126806028 | chr7      | 126805969 | +  | mm     | 7qF2    | ENSMUST   | 117147    |
| chain (J558 family) C  | 116699393 | chr12     | 116699334 | -         | mm | 12qF2  | ENSMUST | 000001035 |           |
| GO:000551              | GO:000361 | 148819961 | chr7      | 148819902 | -  | mm     | 7qF5    | ENSMUST   | 353328    |
| GO:000551              | GO:004339 | 115243624 | chr13     | 115243565 | -  | mm     | 13qD2   | ENSMUST   | 14313     |
| GO:000551              | GO:000361 | 77356402  | chr15     | 77356343  | -  | mm     | 15qE1   | ENSMUST   | 108956    |
| sculus similar to [Hum | 69714551  | chr6      | 69714492  | -         | mm | 6qC1   |         |           | 100046973 |
| GO:000562              | GO:000382 | 43537254  | chr2      | 43537195  | +  | mm     | 2qB     | ENSMUST   | 70789     |
| GO:000578              | GO:000449 | 146673925 | chr5      | 146672058 | -  | mm     | 5qG2    | ENSMUST   | 13112     |
|                        |           | 107199491 | chr8      | 107199432 | -  | mm     | 8qD3    |           |           |
| GO:000562              | GO:000521 | 36750662  | chr16     | 36750603  | -  | mm     | 16qB3   | ENSMUST   | 57738     |
| GO:000573              | GO:000382 | 13136541  | chr17     | 13136482  | -  | mm     | 17qA1   | ENSMUST   | 110460    |
| GO:000588              | GO:000521 | 72342820  | chr15     | 72342761  | -  | mm     | 15qD3   | ENSMUST   | 223604    |
| GO:000573              | GO:000512 | 96674345  | chr3      | 96674286  | +  | mm     | 3qF2.1  | ENSMUST   | 59020     |
| GO:000551              | GO:000361 | 44680958  | chr14     | 44680899  | +  | mm     | 14qC1   |           | 503845    |
| GO:000551              | GO:000361 | 115251612 | chr4      | 115251553 | +  | mm     | 4qD1    | ENSMUST   | 666168    |
| GO:000588              | GO:000532 | 110962106 | chr7      | 110962047 | -  | mm     | 7qE3    |           | 15130     |
| GO:000578              | GO:000016 | 13573760  | chr7      | 13573701  | -  | mm     | 7qA1    | ENSMUST   | 26459     |
| male liver tumor cDNA  | 46352115  | chr8      | 46352056  | -         | mm | 8qB1.1 |         |           | 102293    |
| GO:000551              | GO:000361 | 106420569 | chr4      | 106420510 | +  | mm     | 4qC7    | ENSMUST   | 230579    |
| GO:000573              | GO:000811 | 77694332  | chr11     | 77694273  | -  | mm     | 11qB5   | ENSMUST   | 19193     |
| GO:000573              | GO:000551 | 89455923  | chr7      | 89455864  | +  | mm     | 7qD3    | ENSMUST   | 20408     |
| GO:000573              | GO:000521 | 130611512 | chr7      | 130611453 | +  | mm     | 7qF3    | ENSMUST   | 11833     |
| GO:000578              | GO:000449 | 115206259 | chr4      | 115206200 | +  | mm     | 4qD1    |           | 13117     |
| GO:000551              | GO:000486 | 10019537  | chr2      | 10018826  | -  | mm     | 2qA1    | ENSMUST   | 16425     |
| GO:000551              | GO:000361 | 96851999  | chr8      | 96851940  | +  | mm     | 8qC5    |           | 97455     |
| GO:000551              | GO:000361 | 51721911  | chr7      | 51721852  | +  | mm     | 7qB4    | ENSMUST   | 68352     |
| GO:000562              | GO:000382 | 106261640 | chr4      | 106261581 | +  | mm     | 4qC7    | ENSMUST   | 74754     |
| GO:000551              | GO:000361 | 3716241   | chr8      | 3716182   | -  | mm     | 8qA1.   | ENSMUST   | 75863     |
| GO:000551              | GO:000361 | 148040233 | chr5      | 148040174 | -  | mm     | 5qG3    |           | 70147     |
| GO:000588              | GO:000532 | 121287656 | chr6      | 121287597 | +  | mm     | 6qF1    | ENSMUST   | 14412     |
| GO:000588              | GO:000520 | 76542136  | chr2      | 76542077  | -  | mm     | 2qC3    | ENSMUST   | 22138     |
| GO:000551              | GO:000361 | 68054137  | chr13     | 68054078  | +  | mm     | 13qB3   |           | 666185    |
| GO:000551              | GO:000361 | 127707032 | chr10     | 127706973 | +  | mm     | 10qD3   | ENSMUST   | 103161    |
| GO:000551              | GO:000486 | 105480104 | chr12     | 105480045 | +  | mm     | 12qE    | ENSMUST   | 20715     |
| GO:001602              | GO:000361 | 35372413  | chr18     | 35372354  | -  | mm     | 18qB1   | ENSMUST   | 107065    |
| GO:000562              | GO:000486 | 31629642  | chr5      | 31629583  | +  | mm     | 5qB1    | ENSMUST   | 231103    |
| male tongue cDNA, RIF  | 137772104 | chr4      | 137772045 | +         | mm | 4qD3   | ENSMUST | 000001058 |           |
| GO:000551              | GO:000361 | 68054129  | chr13     | 68054070  | +  | mm     | 13qB3   |           | 666185    |
| GO:000578              | GO:000382 | 66605889  | chr14     | 66605830  | -  | mm     | 14qD1   | ENSMUST   | 268756    |
| GO:000551              | GO:000361 | 92058476  | chr3      | 92058417  | +  | mm     | 3qF1    | ENSMUST   | 100303744 |
| 9(cell fate            | GO:004681 | 84522011  | chr6      | 84521952  | -  | mm     | 6qC3    | ENSMUST   | 232174    |
| sculus similar to Endo | 137540462 | chr4      | 137540403 | +         | mm | 4qD3   |         |           | 100047148 |
| GO:000551              | GO:000512 | 42250164  | chr4      | 42250105  | +  | mm     | 4qA5    | ENSMUST   | 24047     |
| GO:000551              | GO:000361 | 60938942  | chr6      | 60938883  | +  | mm     | 6qB3    | ENSMUST   | 70945     |
| GO:000562              | GO:000521 | 57508098  | chr10     | 57508039  | +  | mm     | 10qB4   | ENSMUST   | 12140     |
| GO:000551              | GO:000486 | 22899474  | chr16     | 22899415  | +  | mm     | 16qB1   | ENSMUST   | 11625     |
| GO:0016020(membran     | 35611508  | chr17     | 35611449  | +         | mm | 17qB1  | ENSMUST | 15007     |           |
| urinary protein 2 (Mup | 60149800  | chr4      | 60149741  | -         | mm | 4qB3   | ENSMUST | 17841     |           |
| GO:000551              | GO:000481 | 26701557  | chr16     | 26701498  | +  | mm     | 16qB2   |           | 16180     |
| GO:000551              | GO:000361 | 46853418  | chrX      | 46853359  | +  | mm     | XqA5    | ENSMUST   | 75404     |
| GO:000551              | GO:000382 | 107987321 | chr9      | 107987262 | +  | mm     | 9qF2    | ENSMUST   | 15235     |
| GO:000573              | GO:000841 | 25281861  | chr2      | 25281802  | +  | mm     | 2qA3    | ENSMUST   | 14347     |
| GO:000562              | GO:000382 | 138093775 | chr3      | 138093716 | +  | mm     | 3qG3    | ENSMUST   | 26876     |

|                       |            |           |       |           |   |    |        |         |           |
|-----------------------|------------|-----------|-------|-----------|---|----|--------|---------|-----------|
| GO:00055              | GO:00051   | 83388282  | chr11 | 83388223  | - | mm | 11qC   | ENSMUST | 20308     |
| GO:00055              | GO:00036   | 90982549  | chr5  | 90982490  | + | mm | 5qE1   | ENSMUST | 280662    |
| GO:00055              | GO:00036   | 105632169 | chr12 | 105632110 | + | mm | 12qE   | ENSMUST | 20717     |
| GO:00055              | GO:00038   | 91465569  | chr2  | 91465510  | - | mm | 2qE1   | ENSMUST | 14061     |
| GO:00080              | GO:00052   | 106909759 | chr3  | 106909700 | + | mm | 3qF2.3 | ENSMUST | 16490     |
| GO:00055              | GO:00001   | 91441634  | chrX  | 91436226  | - | mm | XqC3   | ENSMUST | 26905     |
| GO:00055              | GO:00036   | 43915153  | chr19 | 43915094  | + | mm | 19qC3  |         | 100038628 |
| GO:00055              | GO:00055   | 132532783 | chr1  | 132532724 | - | mm | 1qE4   | ENSMUST | 12269     |
| GO:00055              | GO:00048   | 105185231 | chr12 | 105185172 | - | mm | 12qE   | ENSMUST | 20704     |
| GO:00055              | GO:00036   | 88329223  | chr12 | 88329164  | - | mm | 12qD2  | ENSMUST | 238331    |
| GO:00055              | GO:00036   | 70334214  | chr11 | 70334155  | + | mm | 11qB3  | ENSMUST | 216871    |
| GO:00057              | GO:00044   | 39465474  | chr19 | 39465415  | - | mm | 19qC3  | ENSMUST | 13097     |
| GO:00055              | GO:00051   | 87393620  | chr10 | 87393561  | + | mm | 10qC1  | ENSMUST | 16000     |
| GO:00058              | GO:00042   | 89044292  | chr1  | 89044233  | - | mm | 1qD    | ENSMUST | 13599     |
| GO:00055              | GO:00036   | 130338576 | chr3  | 130338517 | + | mm | 3qG3   | ENSMUST | 71760     |
| GO:00160              | GO:00048   | 69919627  | chr11 | 69919568  | + | mm | 11qB3  | ENSMUST | 11890     |
| GO:00058              | lipid part | 56251084  | chr17 | 56251025  | - | mm | 17qD   | ENSMUST | 66968     |
| GO:00055              | GO:00051   | 29172989  | chr10 | 29172930  | - | mm | 10qA4  | ENSMUST | 72780     |
| enin, ribonu          | GO:00036   | 51815374  | chr14 | 51815315  | - | mm | 14qC1  | ENSMUST | 11731     |
| in D (Ubd), mRNA [N   | GO:00036   | 37332747  | chr17 | 37332688  | + | mm | 17qB1  | ENSMUST | 24108     |
| GO:00057              | GO:00052   | 137748288 | chr1  | 137747976 | + | mm | 1qE4   | ENSMUST | 21956     |
| GO:00055              | GO:00036   | 68502013  | chr18 | 68501954  | + | mm | 18qE2  |         | 399638    |
| GO:00056              | GO:00038   | 122091072 | chr2  | 122091013 | + | mm | 2qE5   | ENSMUST | 20322     |
| GO:00056              | GO:00015   | 32197304  | chr11 | 32197245  | + | mm | 11qA4  |         | 110257    |
| GO:00057              | GO:00040   | 20767612  | chr19 | 20767553  | - | mm | 19qB   | ENSMUST | 26358     |
| GO:00055              | GO:00200   | 112740363 | chr7  | 112740304 | - | mm | 7qE3   | ENSMUST | 15458     |
| GO:00055              | GO:00036   | 39683488  | chr19 | 39683429  | - | mm | 19qC3  | ENSMUST | 545288    |
| GO:00055              | GO:00051   | 81860715  | chr11 | 81860656  | + | mm | 11qC   | ENSMUST | 20306     |
| GO:00055              | GO:00038   | 13055833  | chr8  | 13055774  | + | mm | 8qA1.1 | ENSMUST | 14058     |
| GO:00055              | GO:00051   | 42285908  | chr8  | 42285849  | - | mm | 8qA4   | ENSMUST | 234199    |
| GO:00057              | GO:00036   | 31296236  | chr7  | 31296177  | + | mm | 7qB1   | ENSMUST | 56189     |
| GO:00160              | 20(membran | 122624241 | chr4  | 122624182 | - | mm | 4qD2.2 | ENSMUST | 76574     |
| GO:00055              | GO:00036   | 44681178  | chr14 | 44681119  | + | mm | 14qC1  | ENSMUST | 13587     |
| ed gene 15698 (Gm1    | GO:00036   | 88826082  | chr11 | 88826023  | - | mm | 11qC   | ENSMUST | 217066    |
| GO:00055              | GO:00081   | 103111266 | chr9  | 103111207 | - | mm | 9qF1   | ENSMUST | 22041     |
| GO:00056              | GO:00043   | 78090470  | chr9  | 78090411  | + | mm | 9qE1   | ENSMUST | 14857     |
| GO:00055              | GO:00081   | 103112885 | chr9  | 103112826 | - | mm | 9qF1   | ENSMUST | 22041     |
| GO:00055              | GO:00044   | 32840147  | chr17 | 32840088  | + | mm | 17qB1  | ENSMUST | 106648    |
| GO:00056              | GO:00036   | 118227795 | chr8  | 118227736 | - | mm | 8qE1   | ENSMUST | 17132     |
| GO:00056              | GO:00055   | 20138991  | chrX  | 20138932  | + | mm | XqA1.1 | ENSMUST | 19733     |
| GO:00055              | GO:00019   | 93521624  | chr13 | 93521565  | - | mm | 13qC3  | ENSMUST | 21828     |
| GO:00055              | GO:00036   | 87078879  | chr9  | 87078820  | + | mm | 9qE3.1 | ENSMUST | 244958    |
| GO:00055              | GO:00048   | 105005668 | chr12 | 105004164 | - | mm | 12qE   | ENSMUST | 20703     |
| GO:00056              | GO:00055   | 48358727  | chr13 | 48358668  | + | mm | 13qA5  | ENSMUST | 15904     |
| GO:00056              | GO:00036   | 67485826  | chr5  | 67485767  | - | mm | 5qC3.1 | ENSMUST | 18935     |
| GO:00055              | GO:00051   | 162015244 | chr1  | 162015185 | - | mm | 1qH2.1 | ENSMUST | 329278    |
| GO:00057              | GO:00038   | 101239006 | chr11 | 101238947 | + | mm | 11qD   | ENSMUST | 14377     |
| GO:00057              | GO:00055   | 31715029  | chr14 | 31714970  | + | mm | 14qB   | ENSMUST | 16427     |
| GO:00055              | GO:00036   | 79295347  | chr11 | 79295288  | - | mm | 11qB5  |         | 104522    |
| ged immunoglobulin li | GO:00036   | 68686370  | chr6  | 68686311  | - | mm | 6qC1   | ENSMUST | 00001033  |
| GO:00056              | GO:00036   | 71154965  | chr6  | 71154906  | + | mm | 6qC1   | ENSMUST | 14080     |
| GO:00058              | GO:00038   | 44234550  | chr5  | 44234491  | + | mm | 5qB3   | ENSMUST | 12182     |
| GO:00056              | GO:00043   | 138105003 | chr6  | 138104944 | + | mm | 6qG1   | ENSMUST | 56615     |

| Genbank Accession | GeneName    | Genomic Coordinates      | RefSeqAccession | TIGRID   | UniGeneID |
|-------------------|-------------|--------------------------|-----------------|----------|-----------|
| XM_001474         | similar to  | chr13:1138               | XM_001474       | 162      |           |
| NM_02312          | kininogen   | chr16:2308               | NM_02312        | TC157453 | Mm.2160   |
| NM_00108          | MOCO sul    | chr1:1866                | NM_00108        | TC159871 | Mm.272457 |
| NM_00912          | stearoyl-C  | chr19:4446               | NM_00912        | TC176595 | Mm.267377 |
| NM_02926          | secreted p  | chr1:9032                | NM_02926        | TC158074 | Mm.173058 |
| AK138480          |             | chr9:14523423-14523482   |                 |          | Mm.411788 |
| NM_01347          | apolipopro  | chr1:17315               | NM_01347        | TC157196 | Mm.389209 |
| NM_00977          | compleme    | chr17:5734               | NM_00977        | TC157345 | Mm.19131  |
| NM_14452          | SEC14-lik   | chr11:3997               | NM_14452        | TC158068 | Mm.253922 |
| NM_00112          | predicted   | chr9:78153               | NM_00112        | 2660     | Mm.197422 |
| NM_03200          | neuregulin  | chr9:55068               | NM_03200        | TC166480 | Mm.443874 |
| NM_18184          | fibrinogen  | chr3:82846               | NM_18184        | TC157195 | Mm.30063  |
| NM_01133          | chemokine   | chr4:41775               | NM_01133        | TC158000 | Mm.407493 |
| NM_02128          | cytochrom   | chr7:14796               | NM_02128        | TC171572 | Mm.479137 |
| NM_00840          | inter-alpha | chr14:3174               | NM_00840        |          | Mm.3227   |
| NM_00116          | serine (or  | chr12:1054               | NM_00116        | TC158903 | Mm.312628 |
| NM_17277          | monoamin    | chrX:1628                | NM_17277        | TC157765 | Mm.241656 |
| NM_00818          | glutathione | chr9:78178               | NM_00818        | TC170911 | Mm.422778 |
| NM_17307          | small proli | chr3:92304               | NM_17307        | TC172018 | Mm.246590 |
| NM_01879          | ATP-bindin  | chr7:5323                | NM_01879        | TC158715 | Mm.63514  |
| NM_19817          | cDNA seq    | chr8:10736               | NM_19817        | TC158943 | Mm.443387 |
| NM_00969          | apolipopro  | chr9:4603                | NM_00969        | TC168296 | Mm.26743  |
| NM_17539          | RIKEN cD    | chr3:10552               | NM_17539        | TC157904 | Mm.212591 |
| NM_00103          | WD repeat   | chr9:74130               | NM_00103        | TC164435 | Mm.335289 |
| NM_20721          | UDP glyco   | chr15:9244               | NM_20721        | TC158131 | Mm.422853 |
| NM_01975          | dermatopo   | chr1:16675               | NM_01975        | TC158097 | Mm.28935  |
| NM_00116          | expressed   | chrX:56584               | NM_00116        | TC157194 | Mm.199793 |
| NM_02699          | dimethylar  | chr3:1455                | NM_02699        | TC157908 | Mm.234247 |
| NM_01874          | inter alpha | chr14:3171               | NM_01874        | TC176498 | Mm.34819  |
| NM_01359          | mucosal v   | chr10:7912               | NM_01359        | TC158789 | Mm.391556 |
|                   |             | chr5:087805246-087805187 |                 |          |           |
| NM_01047          | heat shock  | chr17:3510               | NM_01047        | TC175319 | Mm.6388   |
| AK016494          | RIKEN cD    | chr7:135345676-135345617 |                 |          | Mm.441564 |
| NM_02635          | RIKEN cD    | chr3:51192               | NM_02635        | TC157875 | Mm.273339 |
| NM_13366          | esterase 2  | chr8:95725               | NM_13366        | TC158329 | Mm.63490  |
| NM_00893          | protease, s | chr3:12320               | NM_00893        | TC158349 | Mm.9431   |
| NM_17287          | arginine de | chr4:12862               | NM_17287        | TC162437 | Mm.215814 |
| NM_01347          | alpha-2-gl  | chr5:13843               | NM_01347        | TC157782 | Mm.30061  |
| NM_17544          | ethanolam   | chr1:13527               | NM_17544        | TC161838 | Mm.52111  |
| NM_00116          | apolipopro  | chr15:7756               | NM_00116        | 8660     | Mm.422856 |
| NM_00969          | CD5 antig   | chr3:87174               | NM_00969        | TC158087 | Mm.6676   |
| NM_00813          | glycosylat  | chr15:1033               | NM_00813        | TC161559 | Mm.219621 |
| NM_01037          | granzyme    | chr13:1138               | NM_01037        | NP057361 | Mm.15510  |
| NM_13868          | R-spondin   | chr4:12468               | NM_13868        | TC158811 | Mm.42202  |
| NM_01114          | peroxisom   | chr15:8563               | NM_01114        | TC169806 | Mm.212789 |
| NM_01363          | protamine   | chr16:1079               | NM_01363        | TC157262 | Mm.42733  |
| NM_00924          | serine (or  | chr12:105                | NM_00924        | TC163696 | Mm.312593 |
| NM_01060          | potassium   | chr11:6088               | NM_01060        | TC158728 | Mm.4970   |
| NM_00116          | flavin cont | chr3:97459               | NM_00116        | TC167539 | Mm.385180 |
| XM_001480         | predicted   | chr6:12173               | XM_001480       | 274      |           |
| NM_05311          | acyl-Coen   | chr14:9058               | NM_05311        | TC158117 | Mm.28700  |

|           |                            |                          |           |           |           |
|-----------|----------------------------|--------------------------|-----------|-----------|-----------|
| NM_00947  | urate oxid                 | chr3:14629               | NM_00947  | TC157675  | Mm.10865  |
| NM_00924  | serine (or                 | chr12:1050               | NM_00924  | TC165083  | Mm.439695 |
| NM_00116  | brachyury                  | chr17:8615               | NM_00116  | TC159445  | Mm.311080 |
| AK143258  | DNA segment, Chr 13, ERATO |                          |           | TC158603  | Mm.475152 |
| NM_00103  | RIKEN cD                   | chr9:36443               | NM_00103  | TC157699  | Mm.118804 |
| NM_17290  | CD163 mo                   | chr7:1474                | NM_17290  | TC161844  | Mm.19283  |
| NM_01381  | bromodom                   | chr12:5599               | NM_01381  | TC164064  | Mm.479583 |
| NM_00965  | albumin                    | chr5:9090                | NM_00965  | TC174779  | Mm.16773  |
| NM_01687  | WNT1 indu                  | chr2:16363               | NM_01687  | TC158415  | Mm.13828  |
| NM_08084  | serine (or                 | chr1:16293               | NM_08084  | TC157430  | Mm.260770 |
| NM_00940  | peptidogly                 | chr7:19473               | NM_00940  | TC170109  | Mm.21855  |
| NM_01032  | glycine N-                 | chr17:4686               | NM_01032  | TC165770  | Mm.29395  |
| XM_001471 | hypothetic                 | chr2:16439               | XM_001471 | 5180      |           |
| NM_02362  | cytochrom                  | chr15:8259               | NM_02362  | NP749342  | Mm.443024 |
| NM_00969  | apolipopro                 | chr12:8012               | NM_009693 |           | Mm.221239 |
| NM_00794  | epoxide hy                 | chr14:6670               | NM_00794  | TC157576  | Mm.15295  |
| NM_00913  | chemokine                  | chr11:8340               | NM_00913  | TC157645  | Mm.137    |
|           |                            | chr4:111479067-1114      |           | TC1619184 |           |
| NM_14549  | cytochrom                  | chr19:4022               | NM_14549  | TC157676  | Mm.29119  |
| NM_00761  | serine (or                 | chr12:1048               | NM_00761  | TC157527  | Mm.290079 |
| NM_02740  | aldehyde d                 | chr6:90549               | NM_02740  | TC157570  | Mm.30035  |
| NM_01359  | mucosal v                  | chr10:7913               | NM_01359  | TC158789  | Mm.391556 |
| NM_03061  | aldo-keto                  | chr13:4456               | NM_03061  | TC157654  | Mm.196666 |
| NM_02311  | apolipopro                 | chr9:4604                | NM_02311  | TC157703  | Mm.390161 |
| NM_02050  | resistin lik               | chr16:4884               | NM_02050  | TC158329  | Mm.441868 |
| NM_01182  | gremlin 1                  | chr2:11358               | NM_01182  | TC158508  | Mm.474483 |
| NM_00108  | MOCO sul                   | chr1:1866                | NM_00108  | TC171689  | Mm.272457 |
| NM_13905  | nuclear re                 | chr2:38548               | NM_139051 |           | Mm.31387  |
| NM_02790  | transmem                   | chr15:7827               | NM_02790  | TC157996  | Mm.34056  |
| NM_00738  | apolipopro                 | chr7:20263               | NM_00738  | TC158099  | Mm.477720 |
| NM_00916  | SH3-doma                   | chr15:7873               | NM_00916  | TC158179  | Mm.4462   |
| NM_01199  | carbohydr                  | chr8:11255               | NM_01199  | TC158748  | Mm.89207  |
| NM_01040  | hemolytic                  | chr2:34838               | NM_01040  | TC158485  | Mm.2168   |
| NM_00965  | aminolevul                 | chrX:14700               | NM_00965  | TC157613  | Mm.302724 |
| NM_00746  | apolipopro                 | chr7:20274               | NM_00746  | NP427069  | Mm.182440 |
| NM_02311  | aspartoacy                 | chr11:7311               | NM_02311  | TC158170  | Mm.293574 |
| NM_15352  | neuritin 1                 | chr13:3681               | NM_15352  | TC157767  | Mm.232930 |
| NM_01969  | carboxype                  | chr2:13021               | NM_01969  | TC157979  | Mm.112701 |
| NM_01188  | chemokine                  | chr4:42248               | NM_01188  | TC158411  | Mm.459263 |
| NM_00840  | inter-alpha                | chr14:3172               | NM_00840  | TC157971  | Mm.4517   |
| NM_01737  | haptoglobi                 | chr8:11209               | NM_01737  | TC176307  | Mm.26730  |
| BC108385  |                            | chr6:70622214-70622      |           | NP059707  | Mm.333124 |
| NM_02147  | ADAM-like                  | chr14:6918               | NM_02147  | TC158234  | Mm.36742  |
| AK162965  | RIKEN cD                   | chr11:59011363-59011304  |           |           | Mm.339566 |
| NM_03303  | cysteine d                 | chr18:4687               | NM_03303  | TC157205  | Mm.241056 |
| NM_00103  | predicted                  | chr18:6040               | NM_00103  | TC158771  | Mm.357104 |
| NM_00924  | serine (or                 | chr12:1050               | NM_00924  | TC176232  | Mm.439692 |
| AK139634  |                            | chr8:101672030-101672089 |           |           | Mm.220765 |
| NM_00101  | expressed                  | chr12:1100               | NM_00101  | NP712326  | Mm.202653 |
| NM_19866  | proline-ric                | chr6:13215               | NM_19866  | NP139191  | Mm.7982   |
| NM_00111  | keratin ass                | chr16:8957               | NM_00111  | TC167159  | Mm.310906 |
| NM_00924  | serine (or                 | chr12:1050               | NM_00924  | TC168219  | Mm.439692 |
| NM_00825  | 3-hydroxy                  | chr3:98114               | NM_00825  | NP358738  | Mm.289131 |
| NM_00920  | solute car                 | chr17:1284               | NM_00920  | TC157773  | Mm.594    |
| NM_00887  | serine (or                 | chr11:7524               | NM_00887  | TC157489  | Mm.279733 |
| NM_00102  | proline-ric                | chr6:13226               | NM_00102  | NP139191  | Mm.441627 |
| NM_00115  | retinol deh                | chr10:1273               | NM_00115  | TC157696  | Mm.6696   |
| NM_00103  | cyclin-dep                 | chr1:59387               | NM_00103  | TC165927  | Mm.297713 |
| NM_01035  | glutathione                | chr3:10776               | NM_01035  | TC158706  | Mm.440885 |

|              |              |                          |              |          |           |
|--------------|--------------|--------------------------|--------------|----------|-----------|
| NM_18327     | RIKEN cD     | chr14:3516               | NM_18327     | TC158298 | Mm.27156  |
| NM_14557     | family with  | chr6:82042               | NM_14557     | TC158113 | Mm.205854 |
| NM_02894     | coiled-coil  | chr18:745                | NM_02894     | TC170008 | Mm.182293 |
| AK005011     | protein Z,   | chr8:13075883-13075      |              | TC160182 | Mm.441140 |
| NM_01994     | microsoma    | chr6:13810               | NM_01994     | TC167610 | Mm.14796  |
| NM_01197     | vanin 3      | chr10:2358               | NM_01197     | TC158804 | Mm.27334  |
| NM_19819     | retinoic ac  | chr10:2190               | NM_19819     | TC159009 | Mm.440891 |
| NM_02151     | PDZ doma     | chr3:96674               | NM_02151     | TC174287 | Mm.28015  |
| NM_00116     | serine (or   | chr12:1054               | NM_00116     | TC158988 | Mm.312628 |
| XM_90095     | predicted    | chr14:5476               | XM_90095     |          | Mm.303179 |
| NM_14484     | UDP glyco    | chr15:9300               | NM_14484     | TC157622 | Mm.422853 |
| XM_00147     | similar to   | chr6:70653               | XM_00147     | TC170073 | Mm.466597 |
| NM_13380     | kynurenine   | chr1:17759               | NM_13380     | TC158209 | Mm.27217  |
| NM_14494     | urocanase    | chr6:90314               | NM_14494     | TC158521 | Mm.335669 |
| NM_13366     | solute car   | chr6:12131               | NM_13366     | TC158507 | Mm.274506 |
| NM_20136     | cytochrom    | chr15:8238               | NM_20136     | TC158585 | Mm.226708 |
| NM_00108     | WD repeat    | chr5:24218               | NM_00108     | TC160463 | Mm.392539 |
| NM_05311     | eosinophil   | chr14:5187               | NM_05311     | TC158957 | Mm.153688 |
| NM_01076     | mannan-b     | chr4:14797               | NM_01076     | TC159050 | Mm.378962 |
| NM_00925     | serine (or   | chr12:1056               | NM_00925     | TC158066 | Mm.291569 |
| NM_19799     | RIKEN cD     | chr8:10749               | NM_19799     | TC158193 | Mm.26580  |
| BC029734     | fibrinogen   | chr8:42295065-42285914   |              |          | Mm.277955 |
| AK165079     |              | chr8:101672079-101672138 |              |          | Mm.220765 |
| NM_03188     | ATP-bindi    | chr17:8505               | NM_03188     | TC158444 | Mm.289590 |
| NM_13368     | quinolate    | chr7:13425               | NM_13368     | TC158247 | Mm.26928  |
| NM_01103     | paired box   | chr19:4490               | NM_01103     | TC172661 | Mm.445309 |
| NM_01112     | chemokine    | chr4:42232               | NM_01112     | TC158000 | Mm.458815 |
| NM_17773     | solute car   | chr4:10284               | NM_17773     | TC158356 | Mm.281800 |
| DV072245     | expressed    | chr6:67244818-67244877   |              |          | Mm.442234 |
| XM_28619     | cytochrom    | chr7:27737               | XM_28619     |          |           |
| XM_001477170 |              | chr6:69714               | XM_00147     | NP049111 | Mm.304150 |
| NM_00818     | glutathione  | chr3:10774               | NM_00818     | TC158042 | Mm.458154 |
| NM_00911     | serum amy    | chr7:53996               | NM_00911     | TC158299 | Mm.148800 |
| NM_01347     | apolipopro   | chr1:17315               | NM_01347     | TC176735 | Mm.389209 |
| NM_20765     | solute car   | chr18:7834               | NM_20765     | TC158706 | Mm.44158  |
| NM_13319     | liver glyco  | chr12:7129               | NM_13319     | TC157707 | Mm.256926 |
| XM_35693     | predicted    | chr17:2642               | XM_35693     |          | Mm.440059 |
| NM_00969     | apolipopro   | chr7:20257               | NM_00969     | TC159613 | Mm.28394  |
| XM_00147     | predicted    | chr4:13120               | XM_00147     | TC163096 | Mm.354822 |
| NM_00812     | gap junctid  | chr3:96857               | NM_00812     | TC158741 | Mm.281816 |
| NM_01197     | solute car   | chr2:12641               | NM_01197     | TC157282 | Mm.290044 |
| NM_01095     | oncoprote    | chr10:5888               | NM_01095     | TC158471 | Mm.123013 |
| NM_02338     | arylacetam   | chr3:59843               | NM_02338     | TC157879 | Mm.24547  |
| NM_01051     | insulin-like | chr10:8739               | NM_01051     | TC158049 | Mm.268521 |
| NM_03116     | interleukin  | chr5:30346               | NM_03116     | TC158658 | Mm.1019   |
| NM_02663     | ADP-ribos    | chr6:13679               | NM_02663     | TC158274 | Mm.31840  |
| XM_00147     | predicted    | chr7:15050               | XM_001477336 |          |           |
| NM_02945     | WD repeat    | chr1:17773               | NM_029453    |          | Mm.50361  |
| AK153745     |              | chr2:11451586-11451      | TC169457     |          | Mm.442139 |
| NM_01006     | deoxyribor   | chr16:4039               | NM_01006     | TC176974 | Mm.440565 |
| NM_02699     | dimethylar   | chr3:14555               | NM_02699     | TC165577 | Mm.234247 |
| NM_00969     | apolipopro   | chr12:8023               | NM_00969     | TC161281 | Mm.221239 |
| NM_00938     | thyroid ho   | chr7:10456               | NM_00938     | TC157444 | Mm.28585  |
|              |              | chr18:60381571-6038      | TC1703733    |          |           |
| NM_00978     | compleme     | chr17:3486               | NM_00978     | NP122037 | Mm.439678 |
| NM_00798     | fatty acid   | chr3:12260               | NM_00798     | TC157819 | Mm.28398  |
| NM_00112     | RIKEN cD     | chrX:1043                | NM_001122596 |          | Mm.265244 |
| NM_02532     | 3-hydroxy    | chr17:8423               | NM_02532     | TC157838 | Mm.30100  |
| NM_15339     | a disinteg   | chr8:25946               | NM_15339     | TC158597 | Mm.269223 |

|           |             |                           |              |          |           |
|-----------|-------------|---------------------------|--------------|----------|-----------|
| XR_001862 | predicted   | chrX:135890435-135890494  |              |          | Mm.426164 |
| NM_14560  | carboxyles  | chr8:10737                | NM_14560     | TC161635 | Mm.28191  |
| NM_01881  | apolipopro  | chr17:3526                | NM_01881     | TC157990 | Mm.2161   |
| NM_15315  | acetyl-Co   | chr17:131                 | NM_15315     | TC170315 | Mm.229342 |
| NM_00781  | cytochrom   | chr5:13833                | NM_00781     | TC158503 | Mm.289886 |
| NM_14557  | glycogen s  | chr6:14237                | NM_14557     | TC158426 | Mm.275975 |
| NM_00768  | compleme    | chr3:12957                | NM_00768     | TC157998 | Mm.117180 |
| NM_01076  | mannan-b    | chr4:14797                | NM_01076     | TC159050 | Mm.378962 |
|           |             | chr18:047101919-047101860 |              |          |           |
| NM_17229  | sulfatase   | chr1:12849                | NM_17229     | TC157699 | Mm.45563  |
| NM_17275  | carboxyles  | chr8:10743                | NM_17275     | TC158322 | Mm.441134 |
| NM_14559  | fibrinogen  | chr8:42276                | NM_14559     | TC158127 | Mm.277955 |
| NM_00824  | macrophag   | chr9:10798                | NM_00824     | TC158333 | Mm.8369   |
| NM_01346  | aldehyde d  | chr19:2071                | NM_01346     | TC171979 | Mm.250866 |
| NM_00103  | angiopoiet  | chr4:14787                | NM_00103     | TC173417 | Mm.388929 |
| NM_00822  | hemoglobin  | chr7:11096                | NM_00822     | TC165646 | Mm.288567 |
| NM_14651  | olfactory r | chr17:3736                | NM_146512    |          | Mm.353371 |
| NM_01939  | fructose b  | chr13:6296                | NM_01939     | TC157243 | Mm.423078 |
| NM_02360  | glycerophd  | chrX:9793                 | NM_02360     | TC160220 | Mm.283495 |
| NM_00924  | serine (or  | chr12:1051                | NM_00924     | TC157363 | Mm.439694 |
| NM_00999  | cytochrom   | chr7:27099                | NM_00999     | TC157527 | Mm.154643 |
| NM_02795  | oxidative s | chr8:12197                | NM_02795     | TC163648 | Mm.272357 |
| NM_00976  | bone marr   | chr5:44233                | NM_00976     | TC158244 | Mm.246332 |
| NM_17230  | cytochrom   | chr4:11511                | NM_172306    |          | Mm.448292 |
| NM_00737  | pregnancy   | chr6:12843                | NM_00737     | TC157446 | Mm.260144 |
| NM_00934  | indolethylz | chr6:55120                | NM_00934     | TC157617 | Mm.299    |
| NM_00110  | cytochrom   | chr15:822                 | NM_001104531 |          | Mm.174372 |
| NM_00819  | compleme    | chr17:3499                | NM_00819     | TC157266 | Mm.653    |
| NM_00117  | adenylate   | chr4:10113                | NM_00117     | TC167715 | Mm.42040  |
| NM_01579  | transferrin | chr5:13802                | NM_015799    |          | Mm.21757  |
| NM_00971  | asialoglyc  | chr11:6987                | NM_00971     | NP050971 | Mm.6559   |
| NR_033566 | expressed   | chr4:14117                | NR_033566    |          | Mm.439819 |
| NM_02706  | compleme    | chr2:25354                | NM_02706     | NP358055 | Mm.24596  |
| NM_00112  | predicted   | chr9:78153                | NM_00112     | TC170911 | Mm.197422 |
| NM_01000  | cytochrom   | chr19:4008                | NM_010001    |          | Mm.38963  |
| AK045415  | RIKEN cD    | chr10:106370663-106370663 |              | TC160283 | Mm.38066  |
| NM_14490  | aldolase B  | chr4:49549                | NM_14490     | TC175630 | Mm.479534 |
| NM_02956  | cytochrom   | chr15:8262                | NM_02956     | TC177180 | Mm.439931 |
| NM_00947  | urate oxid  | chr3:14629                | NM_00947     | TC157675 | Mm.10865  |
|           |             | chr12:105056068-105056009 |              |          |           |
| NM_00108  | asparagina  | chr12:1133                | NM_00108     | TC160227 | Mm.77133  |
| NM_00116  | flavin cont | chr3:97456                | NM_00116     | TC157939 | Mm.385180 |
| NM_00108  | double hor  | chr10:5769                | NM_001081954 |          | Mm.379673 |
| NM_00881  | phosphatic  | chr11:5978                | NM_00881     | TC157910 | Mm.2731   |
| NM_00859  | chemokine   | chr5:92752                | NM_00859     | TC157695 | Mm.766    |
| NM_03060  | chloride cl | chr3:14446                | NM_03060     | TC166667 | Mm.20897  |
| NM_00887  | serine (or  | chr5:13753                | NM_00887     | NP822114 | Mm.250422 |
| NM_05317  | histidine-r | chr16:2296                | NM_05317     | TC157774 | Mm.358794 |
| NM_00989  | cholesterd  | chr19:3454                | NM_00989     | TC157922 | Mm.30824  |
| NM_00110  | RIKEN cD    | chr18:6045                | NM_001101475 |          | Mm.329461 |
| S71555    |             | chr7:110976438-110976438  |              | TC176715 | Mm.288567 |
| NM_14536  | cAMP res    | chr10:8054                | NM_14536     | TC157992 | Mm.294693 |
| NM_00821  | hemoglobin  | chr11:3218                | NM_00821     | TC170711 | Mm.196110 |
| NM_01104  | phosphoer   | chr2:17298                | NM_01104     | NP569055 | Mm.266867 |
| NM_00822  | serine (or  | chr16:1734                | NM_00822     | TC158011 | Mm.6609   |
| NM_01023  | fibronectin | chr1:71632                | NM_01023     | TC157361 | Mm.193099 |
| AK044369  | RIKEN cD    | chr15:72338337-72338337   |              | TC175904 | Mm.397917 |
| NM_01092  | nicotinami  | chr9:48400                | NM_01092     | TC159561 | Mm.458542 |
| NM_03119  | solute car  | chr3:28627                | NM_03119     | TC158002 | Mm.18443  |

|           |             |                          |              |          |           |
|-----------|-------------|--------------------------|--------------|----------|-----------|
| NM_00994  | cytochrom   | chr7:13534               | NM_00994     | TC157577 | Mm.43824  |
| NM_03149  | proline ric | chr6:13255               | NM_03149     | NP057449 | Mm.425348 |
| NM_02984  | melanocor   | chr16:9074               | NM_02984     | TC158220 | Mm.22455  |
| NM_00901  | retinoic ac | chr10:2209               | NM_00901     | TC159009 | Mm.458004 |
| NM_14560  | carboxyles  | chr8:10737               | NM_14560     | TC161635 | Mm.28191  |
| NM_02027  | transient r | chr7:15025               | NM_02027     | NP803518 | Mm.286668 |
| NM_05409  | acyl-CoA    | chr7:12680               | NM_054094    |          | Mm.479600 |
| AY114394  |             | chr12:116699393-116      | NP164116     |          | Mm.304472 |
| BC120907  | mucin 6, g  | chr7:148819961-1488      | TC159118     |          | Mm.246621 |
| NM_00804  | follistatin | chr13:1152               | NM_00804     | TC172761 | Mm.4913   |
| NM_17539  | apolipopro  | chr15:7735               | NM_17539     | TC158047 | Mm.86391  |
| XM_001471 | similar to  | chr6:69714               | XM_001477170 |          |           |
| NM_02755  | kynurenina  | chr2:43537               | NM_02755     | TC158553 | Mm.105278 |
| NM_00781  | cytochrom   | chr5:14667               | NM_00781     | TC166508 | Mm.332844 |
|           |             | chr8:107199491-107199432 |              |          |           |
| NM_02130  | solute car  | chr16:3675               | NM_02130     | TC158086 | Mm.281804 |
| NM_00933  | acetyl-Co   | chr17:1313               | NM_00933     | TC158818 | Mm.439711 |
| NM_00103  | potassium   | chr15:7234               | NM_00103     | NP148060 | Mm.386856 |
| NM_02151  | PDZ doma    | chr3:96674               | NM_02151     | TC175828 | Mm.28015  |
| NM_00101  | eosinophil  | chr14:0446               | NM_001012766 |          | Mm.327386 |
| NM_20164  | cytochrom   | chr4:11525               | NM_20164     | TC164315 | Mm.10742  |
| NM_01695  | hemoglobin  | chr7:11096               | NM_01695     | TC159463 | Mm.288567 |
| NM_00951  | solute car  | chr7:13573               | NM_00951     | TC167758 | Mm.10984  |
| AK050111  | expressed   | chr8:46352115-46352      | TC160675     |          | Mm.36341  |
| NM_14614  | family with | chr4:10642               | NM_14614     | TC158008 | Mm.476048 |
| NM_00895  | pipecolic a | chr11:7769               | NM_00895     | TC157881 | Mm.8543   |
| NM_01740  | SH3-doma    | chr7:89455               | NM_01740     | TC159525 | Mm.736    |
| NM_00747  | aquaporin   | chr7:13061               | NM_007474    |          | Mm.273175 |
| NM_01001  | cytochrom   | chr4:11520               | NM_010011    |          | Mm.10742  |
| NM_01058  | inter-alpha | chr2:10019               | NM_01058     | TC157836 | Mm.182043 |
| BC094434  | expressed   | chr8:96851940-96851999   |              |          | Mm.136496 |
| NM_02669  | aspartate   | chr7:5172                | NM_02669     | TC173633 | Mm.88478  |
| NM_05327  | 24-dehydr   | chr4:10626               | NM_05327     | TC157656 | Mm.133370 |
| NM_02946  | C-type lec  | chr8:37162               | NM_02946     | TC158776 | Mm.390017 |
| AK008755  | RIKEN cD    | chr5:148040233-1480      | TC159957     |          | Mm.17618  |
| NM_14451  | solute car  | chr6:12128               | NM_14451     | TC158012 | Mm.258596 |
| NM_01165  | titin       | chr2:76542               | NM_01165     | TC157967 | Mm.373672 |
| XM_001471 | predicted   | chr13:6805               | XM_001471    | TC162499 | Mm.425830 |
| NM_13399  | apolipopro  | chr10:1277               | NM_13399     | TC157925 | Mm.26513  |
| NM_00925  | serine (or  | chr12:1054               | NM_00925     | TC164823 | Mm.312628 |
| NM_17800  | leucine ric | chr18:3537               | NM_17800     | TC158121 | Mm.39900  |
| NM_14490  | glucokinas  | chr5:31629               | NM_14490     | TC161025 | Mm.100043 |
| AK009512  |             | chr4:137772045-1377      | TC166071     |          | Mm.417833 |
| XM_001471 | predicted   | chr13:6805               | XM_001471    | TC162499 | Mm.425830 |
| NM_17874  | gulonolact  | chr14:6660               | NM_17874     | TC157826 | Mm.26207  |
| NM_00116  | small proli | chr3:92058               | NM_00116     | TC173405 | Mm.429851 |
| NM_17547  | cytochrom   | chr6:84522               | NM_17547     | TC158386 | Mm.255246 |
| XM_001471 | similar to  | chr4:13754               | XM_001477515 |          |           |
| NM_01188  | chemokine   | chr4:42250               | NM_01188     | TC165321 | Mm.459263 |
| NM_02761  | multimerin  | chr6:60938               | NM_02761     | TC159713 | Mm.478501 |
| NM_02127  | fatty acid  | chr10:5750               | NM_02127     | TC157908 | Mm.3644   |
| NM_01346  | alpha-2-H   | chr16:2289               | NM_01346     | TC157379 | Mm.197554 |
| NM_01039  | histocomp   | chr17:3561               | NM_010391    |          | Mm.88795  |
| NM_00104  | major urin  | chr4:60149               | NM_00104     | TC159193 | Mm.458381 |
| NM_13410  | interleukin | chr16:2670               | NM_13410     | TC158923 | Mm.253424 |
| NM_00108  | Rho GTPa    | chrX:4685                | NM_00108     | TC160496 | Mm.44305  |
| NM_00824  | macrophag   | chr9:10798               | NM_00824     | TC158333 | Mm.8369   |
| NM_01352  | fucosyltra  | chr2:2528                | NM_01352     | TC158676 | Mm.1203   |
| NM_01199  | alcohol de  | chr3:13809               | NM_011996    |          | Mm.158750 |

|           |              |                     |           |          |           |
|-----------|--------------|---------------------|-----------|----------|-----------|
| NM_01133  | chemokine    | chr11:8338          | NM_01133  | TC157568 | Mm.416125 |
| NM_14514  | afamin       | chr5:90982          | NM_14514  | TC157967 | Mm.348786 |
| NM_00925  | serine (or   | chr12:1050          | NM_00925  | TC158354 | Mm.291569 |
| NM_01016  | coagulatio   | chr2:91465          | NM_01016  | TC157755 | Mm.89048  |
| NM_00841  | potassium    | chr3:10690          | NM_00841  | TC158811 | Mm.56930  |
| NM_01201  | eukaryotic   | chrX:9144           | NM_01201  | TC167297 | Mm.218851 |
| NR_033472 | predicted    | chr19:4391          | NR_033472 | TC168149 | Mm.212585 |
| NM_00757  | compleme     | chr1:13253          | NM_00757  | TC158138 | Mm.306720 |
| NM_00924  | serine (or   | chr12:1051          | NM_00924  | TC163696 | Mm.312593 |
| NM_00108  | zinc finger  | chr12:8832          | NM_00108  | 0943     | Mm.185890 |
| NM_14602  | glycolipid   | chr11:7033          | NM_14602  | TC158419 | Mm.22551  |
| NM_01000  | cytochrom    | chr19:3946          | NM_01000  | TC159060 | Mm.42100  |
| NM_01051  | insulin-like | chr10:8739          | NM_01051  | TC158815 | Mm.268521 |
| NM_02130  | endothelin   | chr1:89044          | NM_02130  | TC158308 | Mm.140765 |
| NM_02790  | alanine-gly  | chr3:13033          | NM_02790  | TC158249 | Mm.29125  |
| NM_00749  | asialoglyc   | chr11:6991          | NM_00749  | TC158728 | Mm.1357   |
| NM_00107  | perilipin 5  | chr17:5625          | NM_00107  | TC167607 | Mm.254985 |
| NM_02835  | R-spondin    | chr10:2917          | NM_02835  | TC158375 | Mm.45191  |
| NM_00744  | angiogenin   | chr14:5181          | NM_00744  | NP382325 | Mm.377077 |
| NM_02313  | ubiquitin D  | chr17:3733          | NM_02313  | NP377583 | Mm.140210 |
| NM_01161  | troponin T   | chr1:13774          | NM_01161  | NP747460 | Mm.247470 |
| AK037146  | RIKEN cD     | chr18:68501954-6850 |           | TC160784 | Mm.95774  |
| NM_14612  | sorbitol de  | chr2:12209          | NM_14612  | TC176562 | Mm.371580 |
| NM_00108  | hemoglobin   | chr11:3219          | NM_00108  | TC173588 | Mm.196110 |
| NM_01192  | aldehyde c   | chr19:2076          | NM_01192  | TC158254 | Mm.14609  |
| NM_01737  | hemopexin    | chr7:11274          | NM_01737  | TC177143 | Mm.3485   |
| NM_00102  | cytochrom    | chr19:3968          | NM_00102  | 4719     | Mm.297048 |
| NM_01365  | chemokine    | chr11:8186          | NM_01365  | TC163249 | Mm.341574 |
| NM_00797  | coagulatio   | chr8:13055          | NM_00797  | TC158072 | Mm.262589 |
| NM_14559  | fibrinogen   | chr8:42285          | NM_14559  | TC158127 | Mm.277955 |
| NM_01954  | proline def  | chr7:31296          | NM_01954  | TC159630 | Mm.270525 |
| NM_02966  | major facil  | chr4:12262          | NM_02966  | TC157765 | Mm.331842 |
| NM_00789  | eosinophil   | chr14:4468          | NM_00789  | TC158373 | Mm.327386 |
| NR_003564 | transcripti  | chr11:8882          | NR_003564 | TC158200 | Mm.347543 |
| NM_13397  | transferrin  | chr9:10311          | NM_13397  | TC157363 | Mm.37214  |
| NM_00818  | glutathione  | chr9:78090          | NM_00818  | TC176840 | Mm.197422 |
| NM_13397  | transferrin  | chr9:10311          | NM_13397  | TC170171 | Mm.37214  |
| NM_13412  | cytochrom    | chr17:3284          | NM_13412  | TC158448 | Mm.26539  |
| NM_00102  | avian musc   | chr8:11822          | NM_00102  | TC159878 | Mm.439772 |
| NM_00906  | regucalcin   | chrX:20138          | NM_00906  | TC157872 | Mm.2118   |
| NM_01158  | thrombosp    | chr13:9352          | NM_01158  | TC158056 | Mm.20865  |
| NM_00117  | melanocor    | chr9:87078          | NM_00117  | 731      | Mm.335337 |
| NM_00924  | serine (or   | chr12:1050          | NM_00924  | TC178066 | Mm.439695 |
| NM_03116  | inhibitor of | chr13:4835          | NM_03116  | TC158293 | Mm.458006 |
| NM_00888  | paired-like  | chr5:67485          | NM_00888  | TC158422 | Mm.62505  |
| NM_17783  | tenascin N   | chr1:16201          | NM_17783  | TC158617 | Mm.90140  |
| NM_00806  | glucose-6-   | chr11:1012          | NM_00806  | TC157988 | Mm.18064  |
| NM_01874  | inter alpha  | chr14:3171          | NM_01874  | NP358746 | Mm.34819  |
| BG080322  | expressed    | chr11:79295347-7929 |           | TC167255 | Mm.436987 |
| U37911    |              | chr6:68686370-68686 |           | TC169573 | Mm.288753 |
| NM_01739  | fatty acid   | chr6:71154          | NM_01739  | TC178021 | Mm.22126  |
| NM_00976  | bone marr    | chr5:44234          | NM_00976  | TC158244 | Mm.246332 |
| NM_01994  | microsoma    | chr6:13810          | NM_01994  | TC170230 | Mm.14796  |
